# Supplementary material for: In search of herbistasis: COT-metsulfuron methyl displays rare herbistatic properties
Source: Royal Society of Chemistry journal article supplement (doi:10.1039/d4sc06923d), 2024-12-10

## Supplementary Information 2

### **In Search of Herbistasis: COT-Metsulfuron Methyl Displays Rare Herbistatic Properties**

Hui Xing, Sarah K. M. McGregor, Bruna D. Batista, Cassidy Whitefield, Isobella S. J. Stone, Cody-Ellen Murray, Rebecca M. Hurst, Yizhou Liu, Sharon Chow, Tyler Fahrenhorst-Jones, Qi Zhao, Sevan D. Houston, Shu-Hong Hu, Thierry Lonhienne, Amanda Nouwens, Jed M. Burns, G. Paul Savage, Gimme H. Walter, Luke W. Guddat, Michelle A. Rafter and Craig M. Williams\*

## Characterisation Spectra

|                                                                                                                                                             |    |
|-------------------------------------------------------------------------------------------------------------------------------------------------------------|----|
| <sup>1</sup> H NMR (400 MHz, CDCl <sub>3</sub> ) of <b>(2-Bromoethyl)trimethylsilane (18)</b> .....                                                         | 3  |
| <sup>1</sup> H NMR (300 MHz, CDCl <sub>3</sub> ) of <b>Trimethyl(((2-(trimethylsilyl)ethyl)thio)ethynyl)silane (21)</b> .....                               | 4  |
| <sup>1</sup> H NMR (300 MHz, CDCl <sub>3</sub> ) of <b>Methyl 3-((2-(trimethylsilyl)ethyl)thio)propiolate (22)</b> .....                                    | 5  |
| <sup>13</sup> C NMR (125 MHz, CDCl <sub>3</sub> ) of <b>Methyl 3-((2-(trimethylsilyl)ethyl)thio)propiolate (22)</b> .....                                   | 6  |
| <sup>1</sup> H NMR (500 MHz, CDCl <sub>3</sub> ) of <b>Methyl 3-((2-(trimethylsilyl)ethyl)sulfonyl)propiolate (15)</b> .....                                | 7  |
| <sup>13</sup> C NMR (125 MHz, CDCl <sub>3</sub> ) of <b>Methyl 3-((2-(trimethylsilyl)ethyl)sulfonyl)propiolate (15)</b> .....                               | 8  |
| <sup>1</sup> H NMR (500 MHz, CDCl <sub>3</sub> ) of <b>Methyl 2-((2-(trimethylsilyl)ethyl)sulfonyl)cycloocta-1,3,5,7-tetraene-1-carboxylate (23)</b> .....  | 9  |
| <sup>13</sup> C NMR (125 MHz, CDCl <sub>3</sub> ) of <b>Methyl 2-((2-(trimethylsilyl)ethyl)sulfonyl)cycloocta-1,3,5,7-tetraene-1-carboxylate (23)</b> ..... | 10 |
| <sup>1</sup> H NMR (500 MHz, CDCl <sub>3</sub> ) of <b>Methyl 2-sulfamoylcycloocta-1,3,5,7-tetraene-1-carboxylate (24)</b> .....                            | 11 |
| <sup>13</sup> C NMR (125 MHz, CDCl <sub>3</sub> ) of <b>Methyl 2-sulfamoylcycloocta-1,3,5,7-tetraene-1-carboxylate (24)</b> .....                           | 12 |
| <sup>1</sup> H NMR (500 MHz, CD <sub>3</sub> CN) of <b>Phenyl <i>N</i>-(4-methoxy-6-methyl-1,3,5-triazin-2-yl) (26)</b> .....                               | 13 |
| <sup>1</sup> H NMR (500 MHz, CDCl <sub>3</sub> ) of <b>COT-MM (10)</b> .....                                                                                | 14 |
| <sup>13</sup> C NMR (125 MHz, CDCl <sub>3</sub> ) of <b>COT-MM (10)</b> .....                                                                               | 15 |
| <sup>1</sup> H NMR (500 MHz, D <sub>2</sub> O) of <b>COT-MM K<sup>+</sup></b> .....                                                                         | 16 |
| <sup>13</sup> C NMR (125 MHz, D <sub>2</sub> O) of <b>COT-MM K<sup>+</sup></b> .....                                                                        | 17 |
| HRMS ESI of <b>COT-MM K<sup>+</sup></b> .....                                                                                                               | 18 |
| <sup>1</sup> H NMR (500 MHz, D <sub>2</sub> O) of <b>MM K<sup>+</sup></b> .....                                                                             | 19 |
| HRMS ESI of <b>MM K<sup>+</sup></b> .....                                                                                                                   | 20 |
| <sup>1</sup> H NMR (300 MHz, CDCl <sub>3</sub> ) of <b>Methyl 4-chlorocubane-1-carboxylate (33)</b> .....                                                   | 21 |
| <sup>1</sup> H NMR (500 MHz, CDCl <sub>3</sub> ) of <b>(4-chlorocuban-1-yl)methanol (34)</b> .....                                                          | 22 |
| <sup>13</sup> C NMR (125 MHz, CDCl <sub>3</sub> ) of <b>(4-chlorocuban-1-yl)methanol (34)</b> .....                                                         | 23 |
| <sup>1</sup> H NMR (500 MHz, CDCl <sub>3</sub> ) of <b>((4-Chlorocuban-1-yl)methyl) ethanethioate (35)</b> .....                                            | 24 |
| <sup>13</sup> C NMR (125 MHz, CDCl <sub>3</sub> ) of <b>((4-Chlorocuban-1-yl)methyl) ethanethioate (35)</b> .....                                           | 25 |
| <sup>1</sup> H NMR (500 MHz, CDCl <sub>3</sub> ) of <b>(4-chlorocuban-1-yl)methanethiol (36)</b> .....                                                      | 26 |
| <sup>13</sup> C NMR (125 MHz, CDCl <sub>3</sub> ) of <b>(4-chlorocuban-1-yl)methanethiol (36)</b> .....                                                     | 27 |
| <sup>1</sup> H NMR (500 MHz, CDCl <sub>3</sub> ) of <b>((4-Chlorocuban-1-yl)methyl)diethylcarbamothioate (38)</b> .....                                     | 28 |
| <sup>13</sup> C NMR (125 MHz, CDCl <sub>3</sub> ) of <b>((4-Chlorocuban-1-yl)methyl)diethylcarbamothioate (38)</b> .....                                    | 29 |

|                                                                                                 |    |
|-------------------------------------------------------------------------------------------------|----|
| $^1\text{H}$ NMR (500 MHz, $\text{CDCl}_3$ ) of <b>COT-BT (28)</b> .....                        | 30 |
| $^{13}\text{C}$ NMR (125 MHz, $\text{CDCl}_3$ ) of <b>COT-BT (28)</b> .....                     | 31 |
| $^1\text{H}$ - $^{13}\text{C}$ HSQC NMR (500 MHz, $\text{CDCl}_3$ ) of <b>COT-BT (28)</b> ..... | 32 |

$^1\text{H}$  NMR (400 MHz,  $\text{CDCl}_3$ ) of (2-Bromoethyl)trimethylsilane (18)

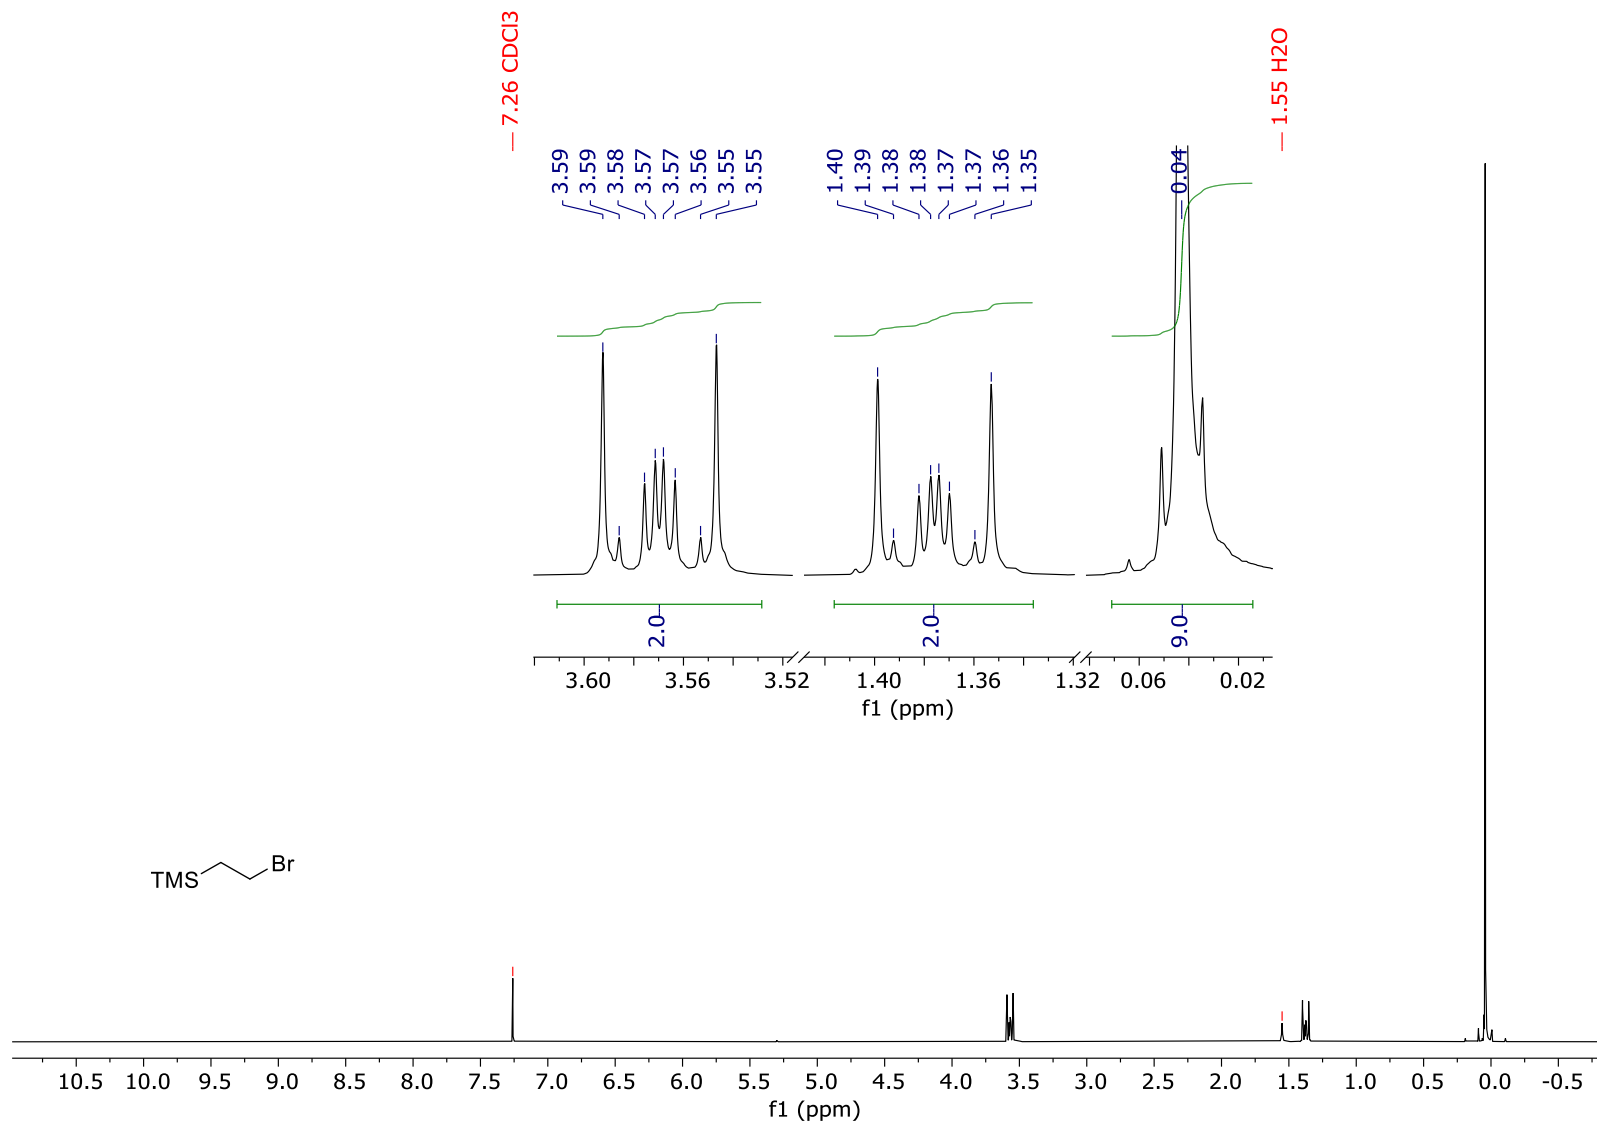

$^1\text{H}$  NMR (300 MHz,  $\text{CDCl}_3$ ) of Trimethyl(((2-(trimethylsilyl)ethyl)thio)ethynyl)silane (21)

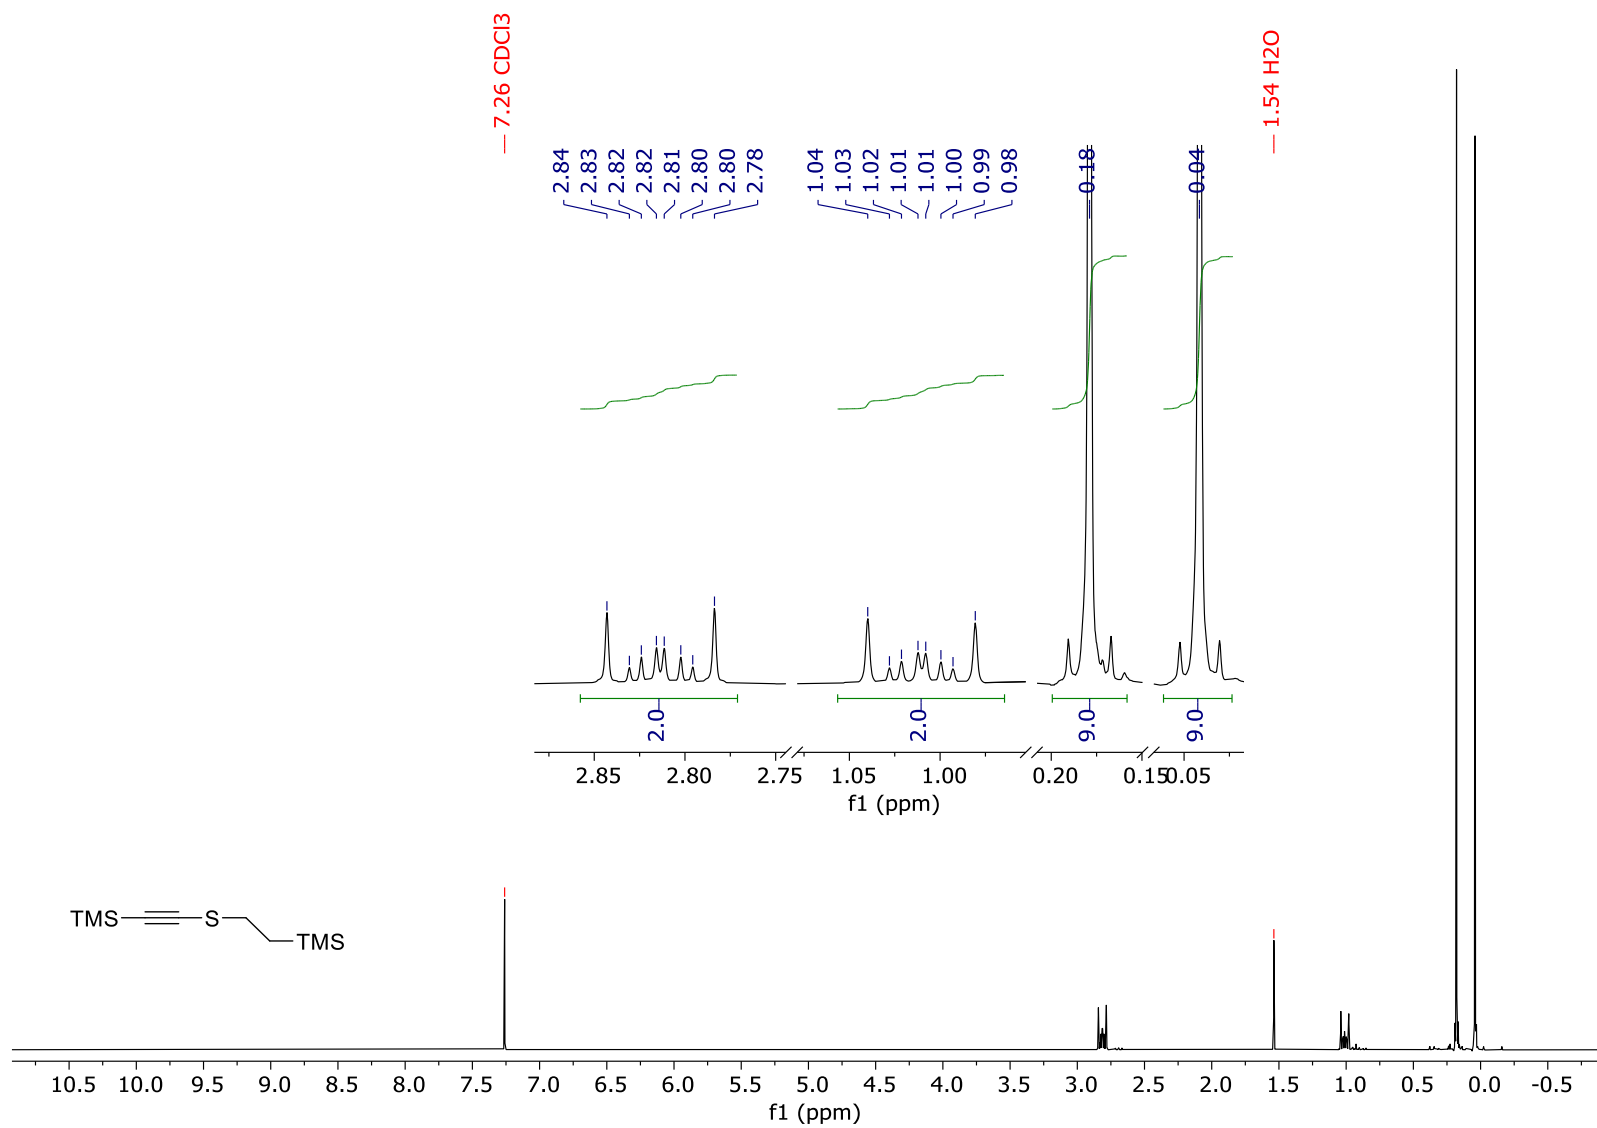

$^1\text{H}$  NMR (300 MHz,  $\text{CDCl}_3$ ) of Methyl 3-((2-(trimethylsilyl)ethyl)thio)propiolate (22)

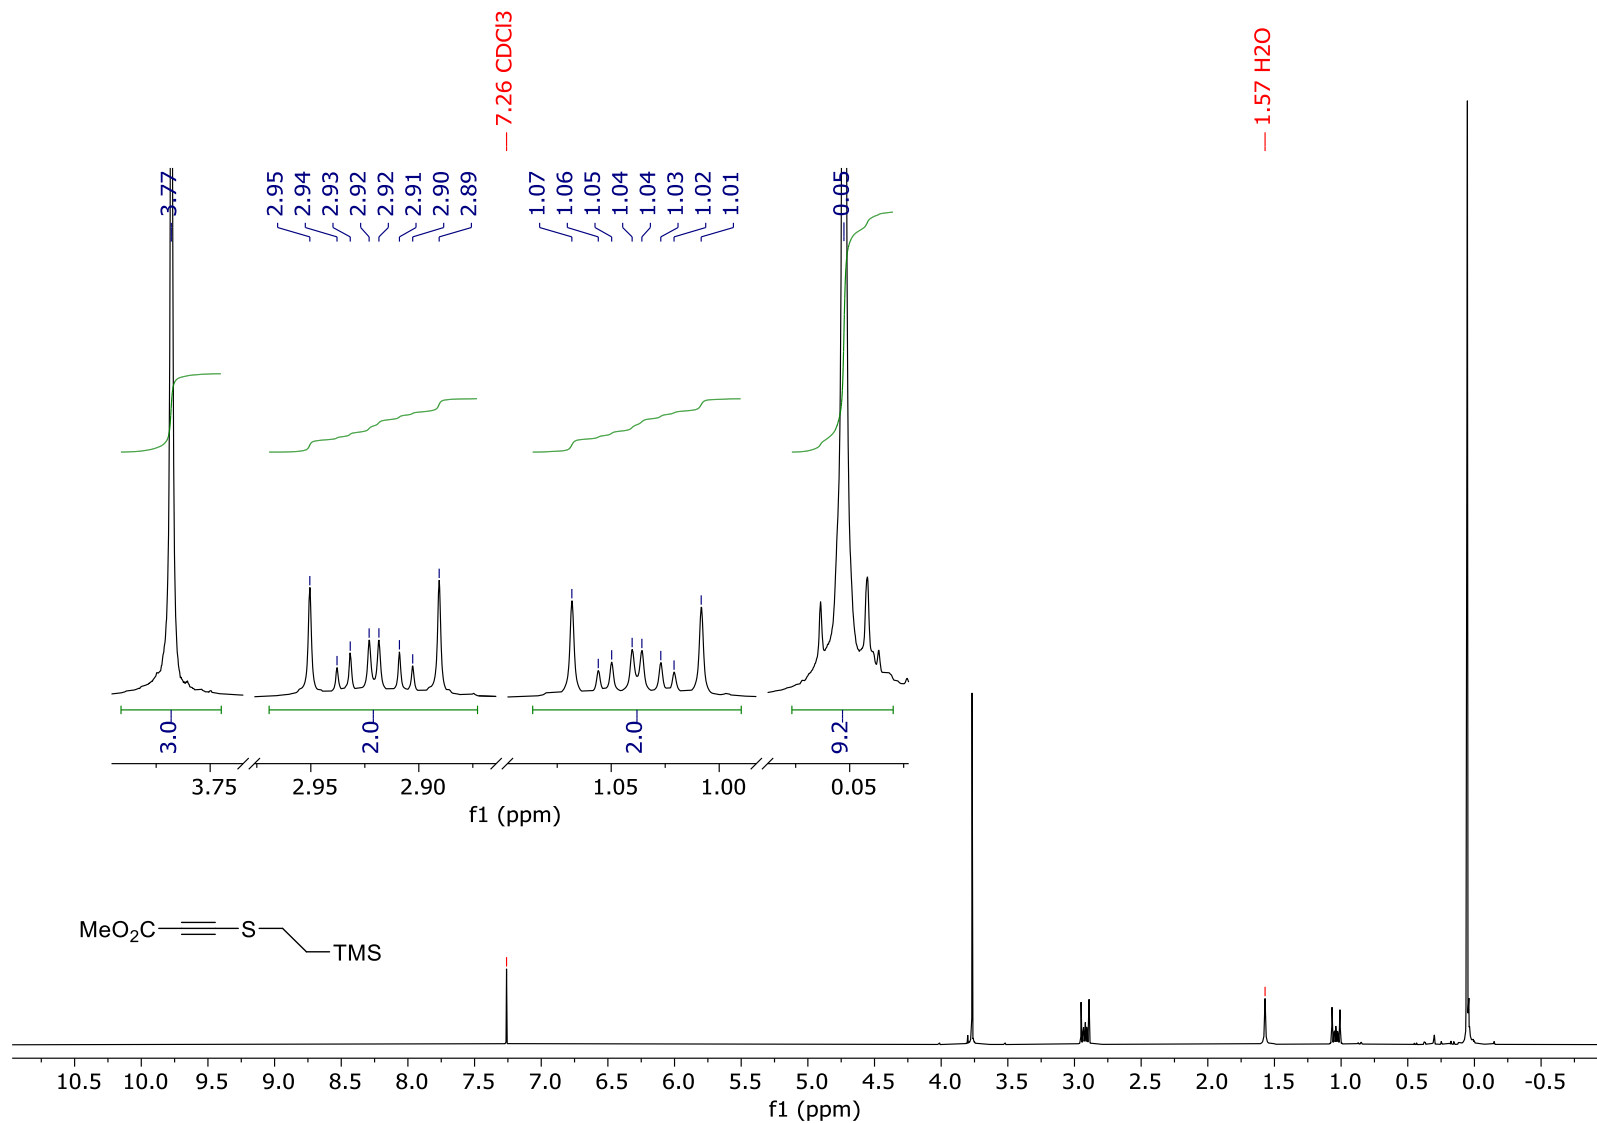

<sup>13</sup>C NMR (125 MHz, CDCl<sub>3</sub>) of Methyl 3-((2-(trimethylsilyl)ethyl)thio)propiolate (22)

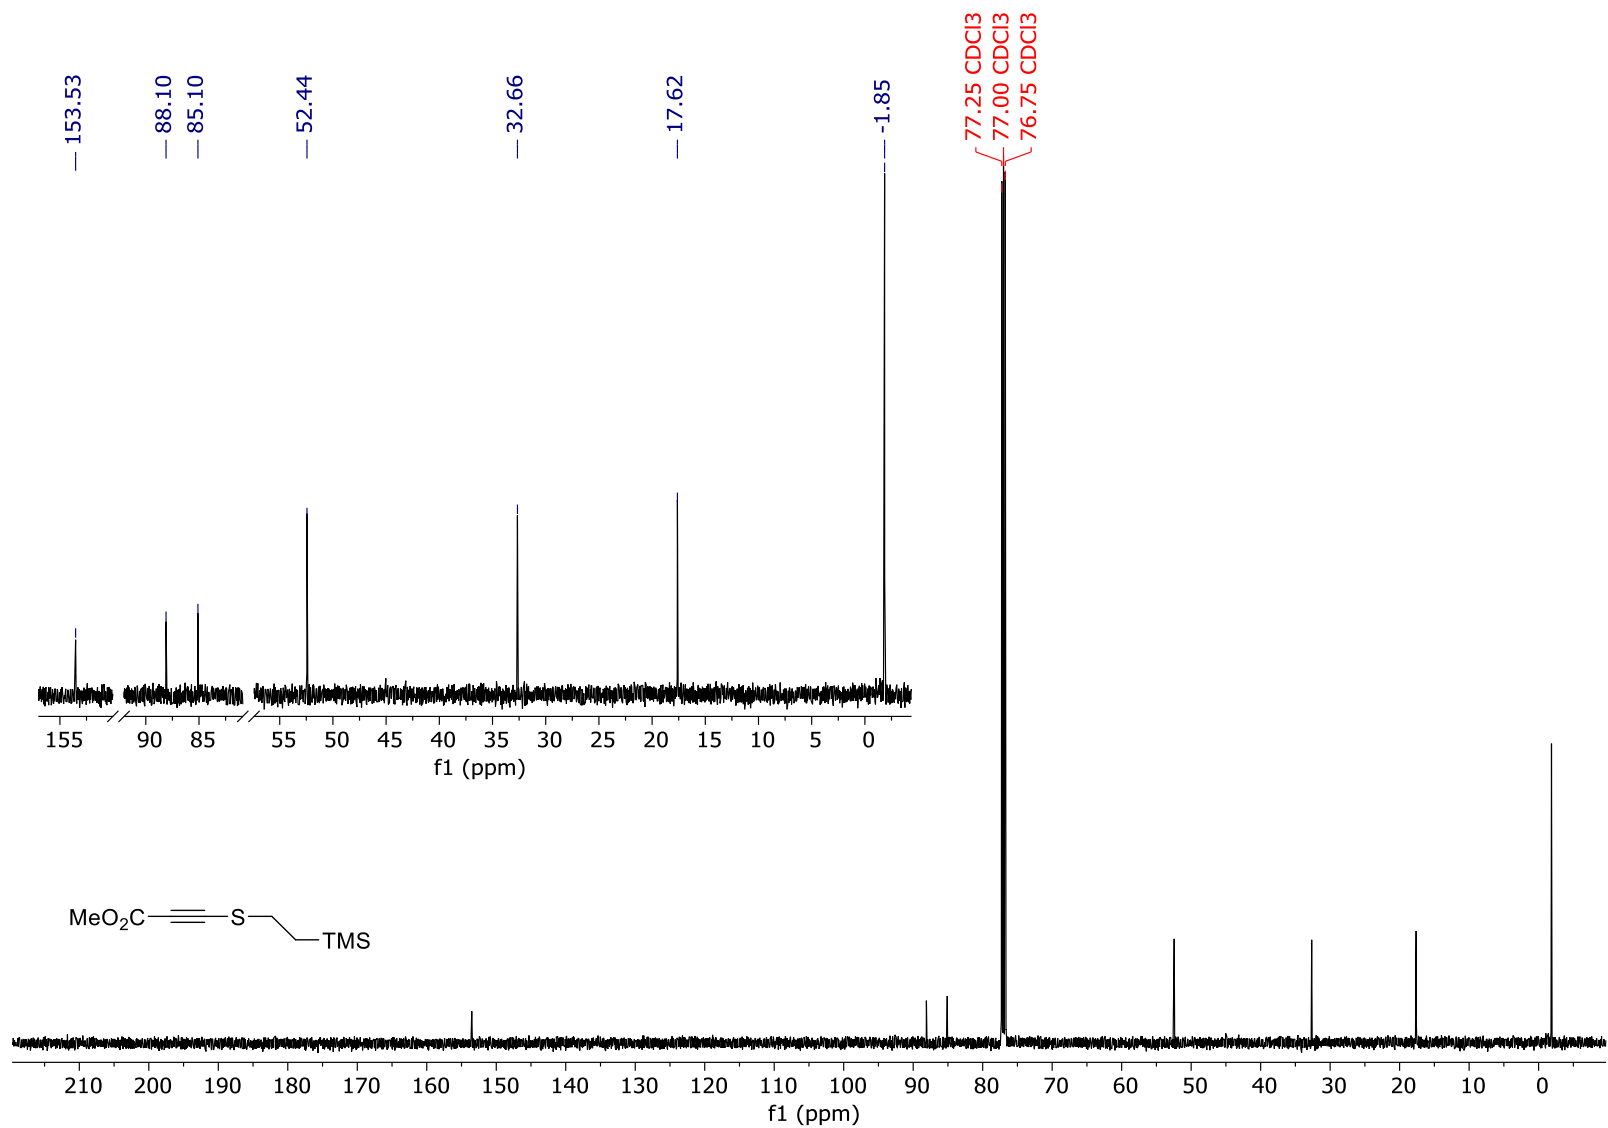

$^1\text{H}$  NMR (500 MHz,  $\text{CDCl}_3$ ) of Methyl 3-((2-(trimethylsilyl)ethyl)sulfonyl)propiolate (15)

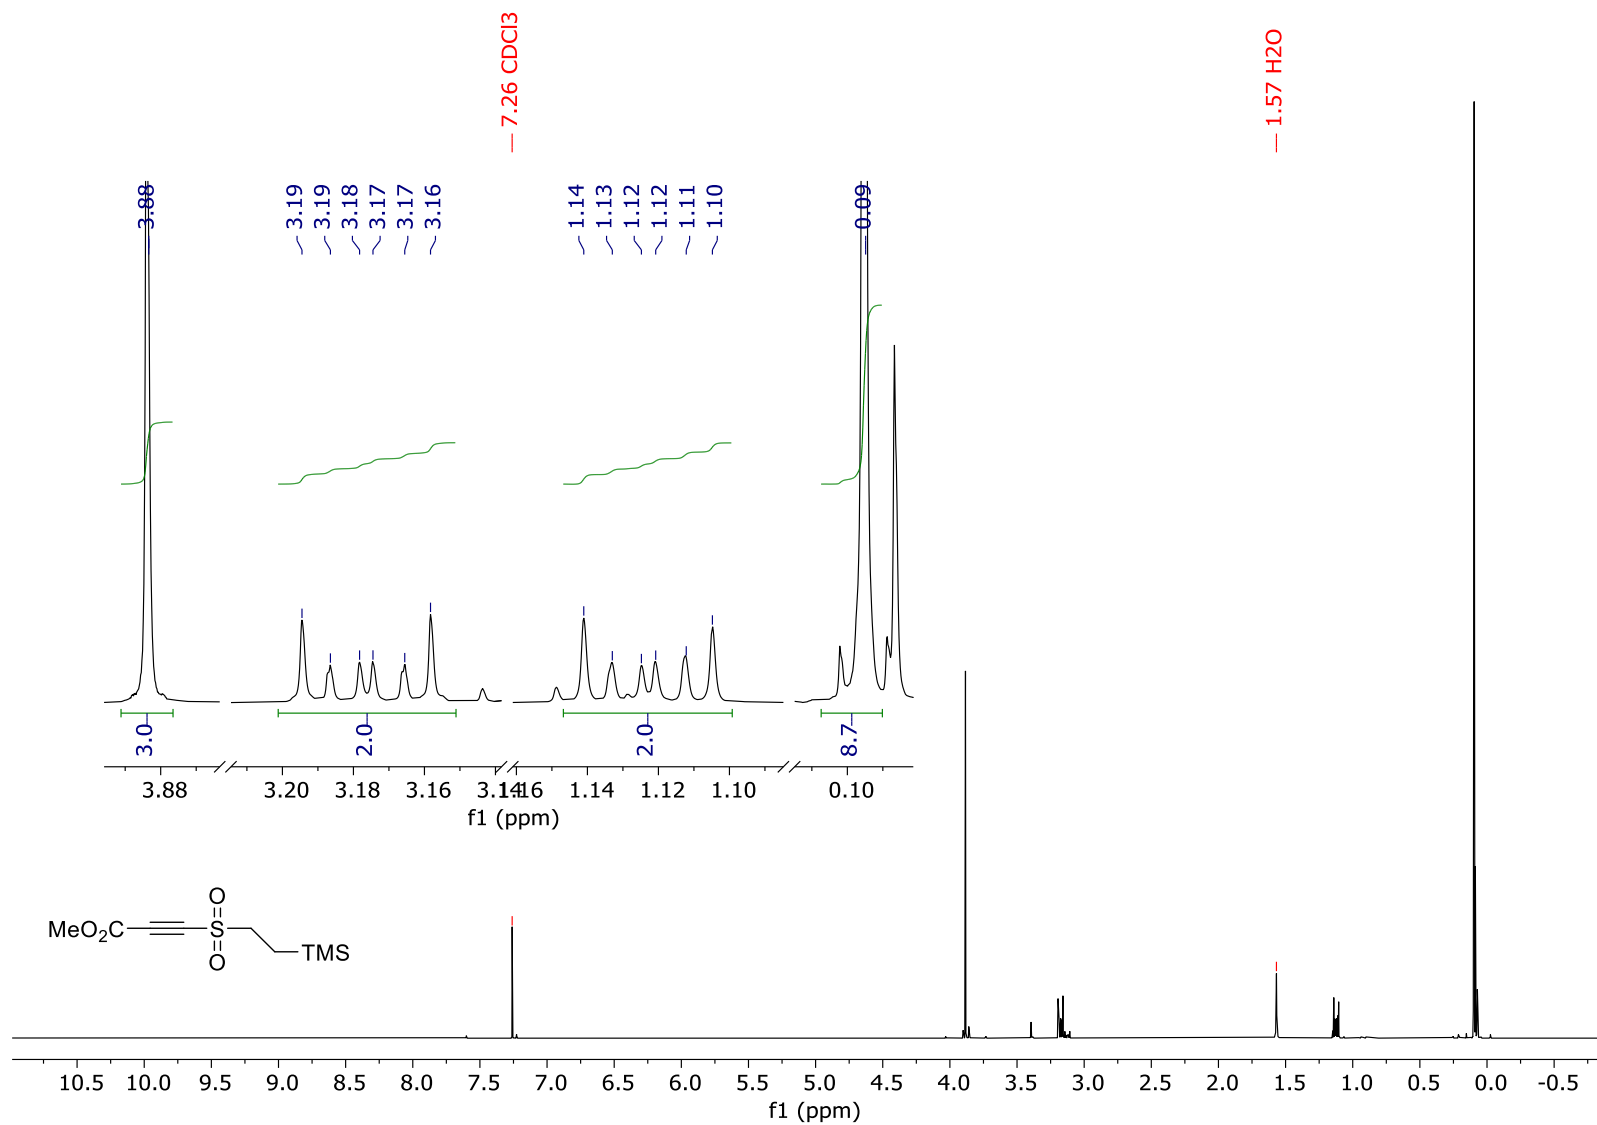



<sup>13</sup>C NMR (125 MHz, CDCl<sub>3</sub>) of Methyl 3-((2-(trimethylsilyl)ethyl)sulfonyl)propiolate (15)

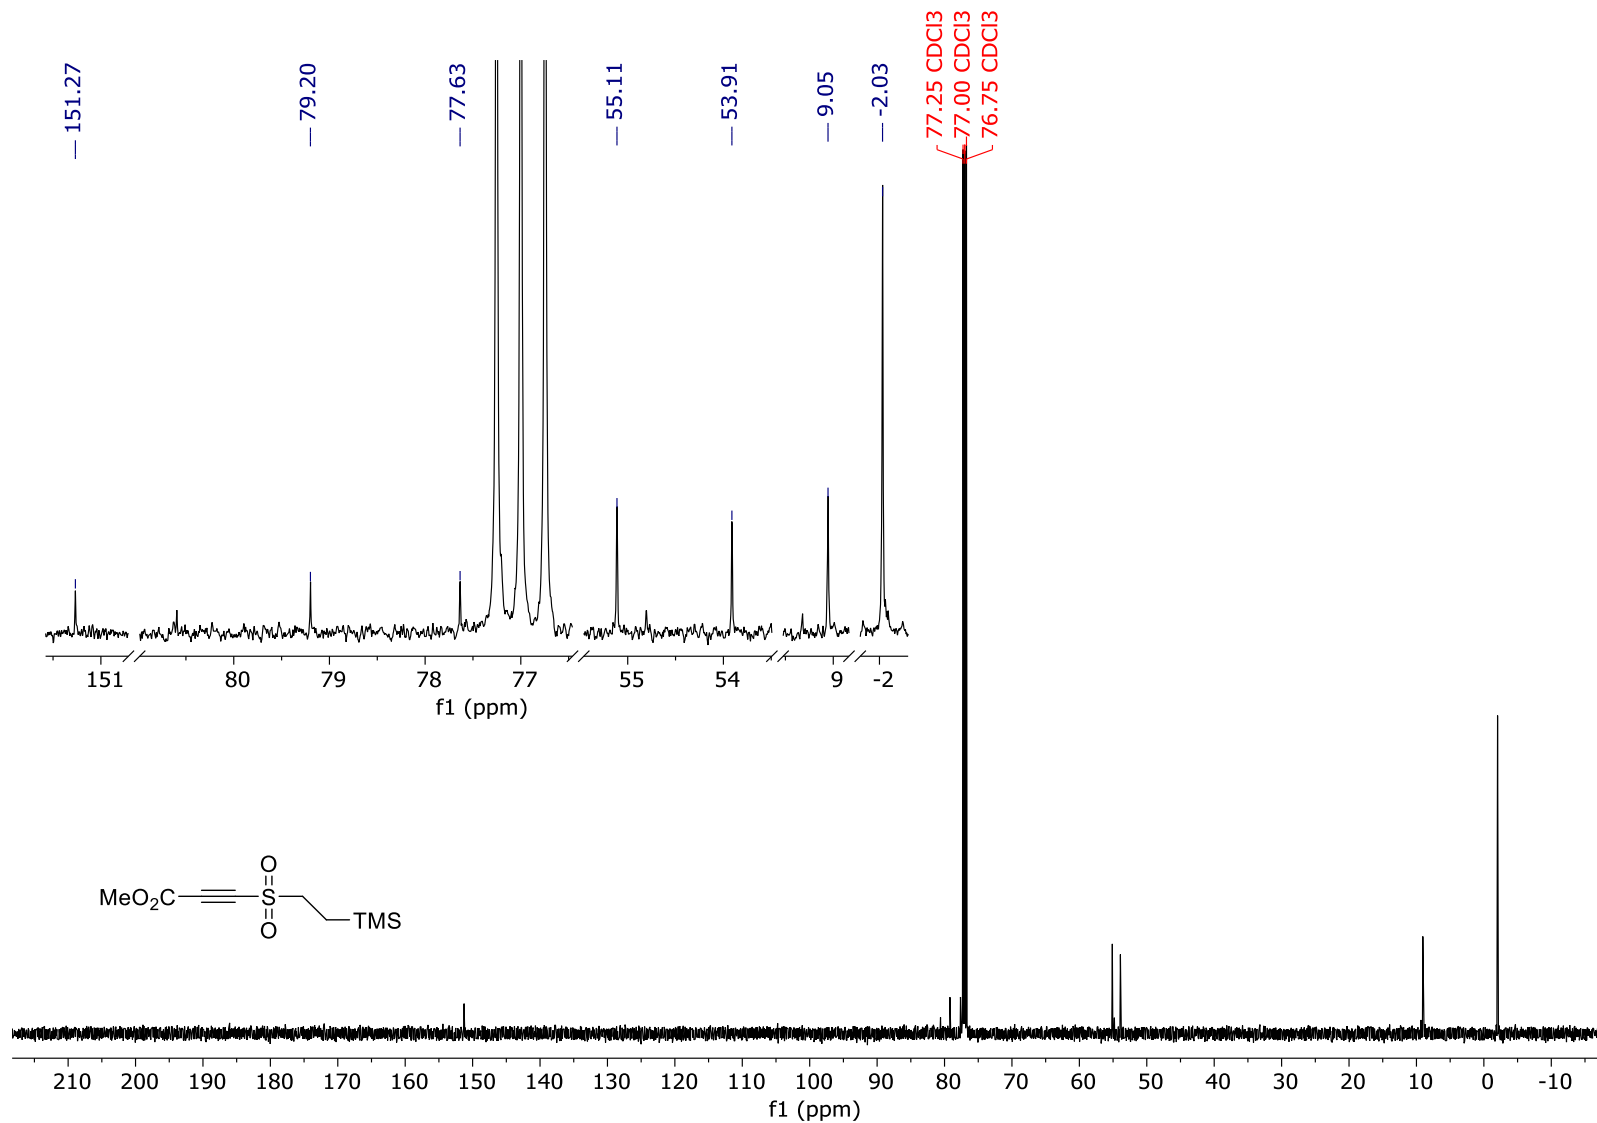

<sup>1</sup>H NMR (500 MHz, CDCl<sub>3</sub>) of Methyl 2-((2-(trimethylsilyl)ethyl)sulfonyl)cycloocta-1,3,5,7-tetraene-1-carboxylate (23)

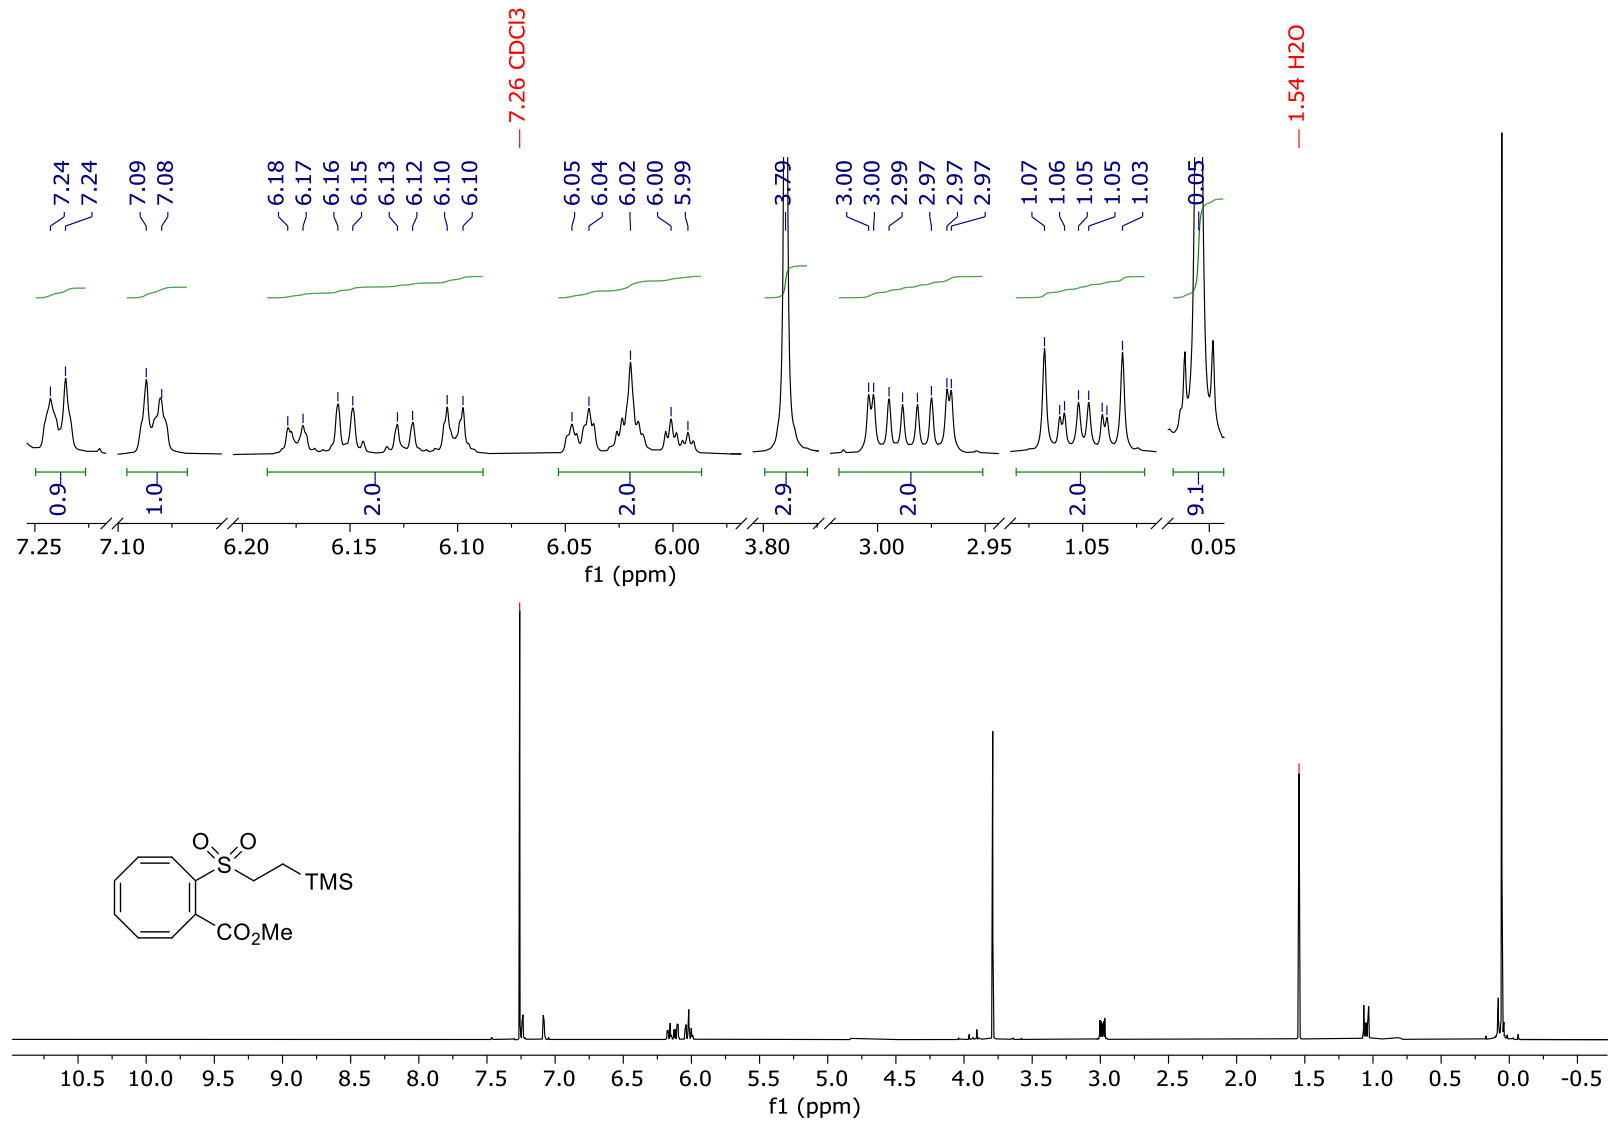

<sup>13</sup>C NMR (125 MHz, CDCl<sub>3</sub>) of Methyl 2-((2-(trimethylsilyl)ethyl)sulfonyl)cycloocta-1,3,5,7-tetraene-1-carboxylate (23)

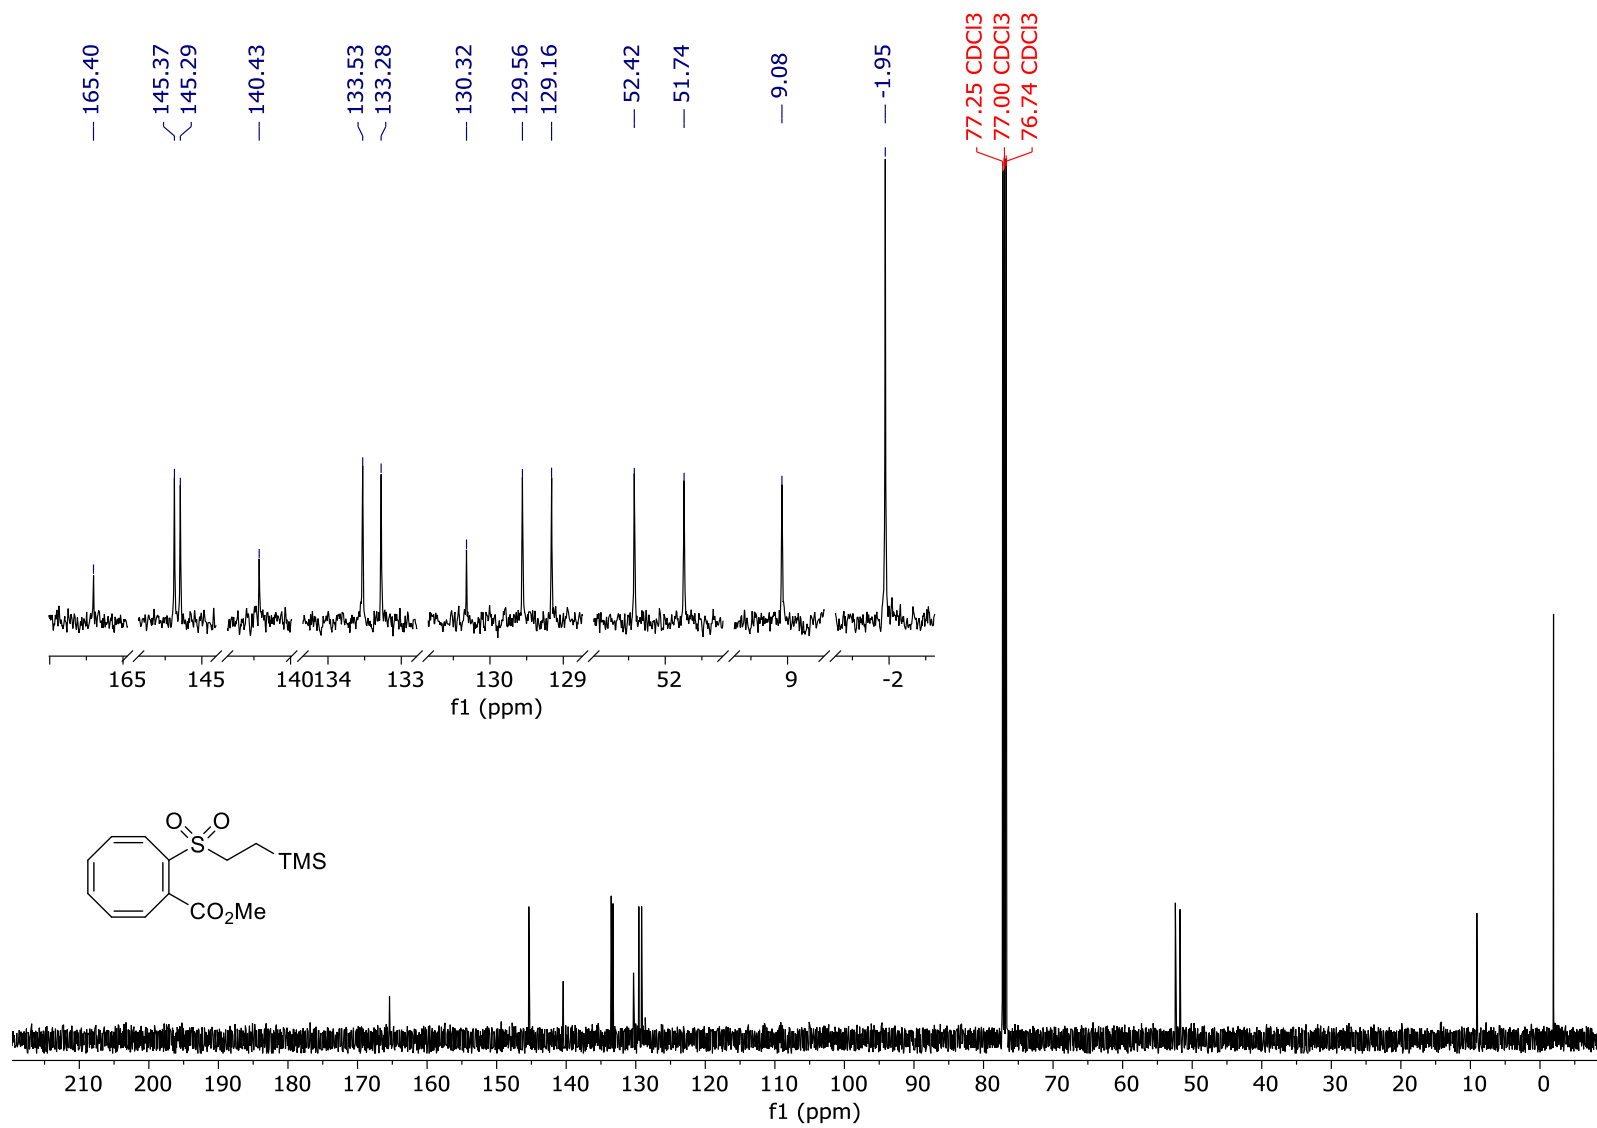

$^1\text{H}$  NMR (500 MHz,  $\text{CDCl}_3$ ) of Methyl 2-sulfamoylcycloocta-1,3,5,7-tetraene-1-carboxylate (24)

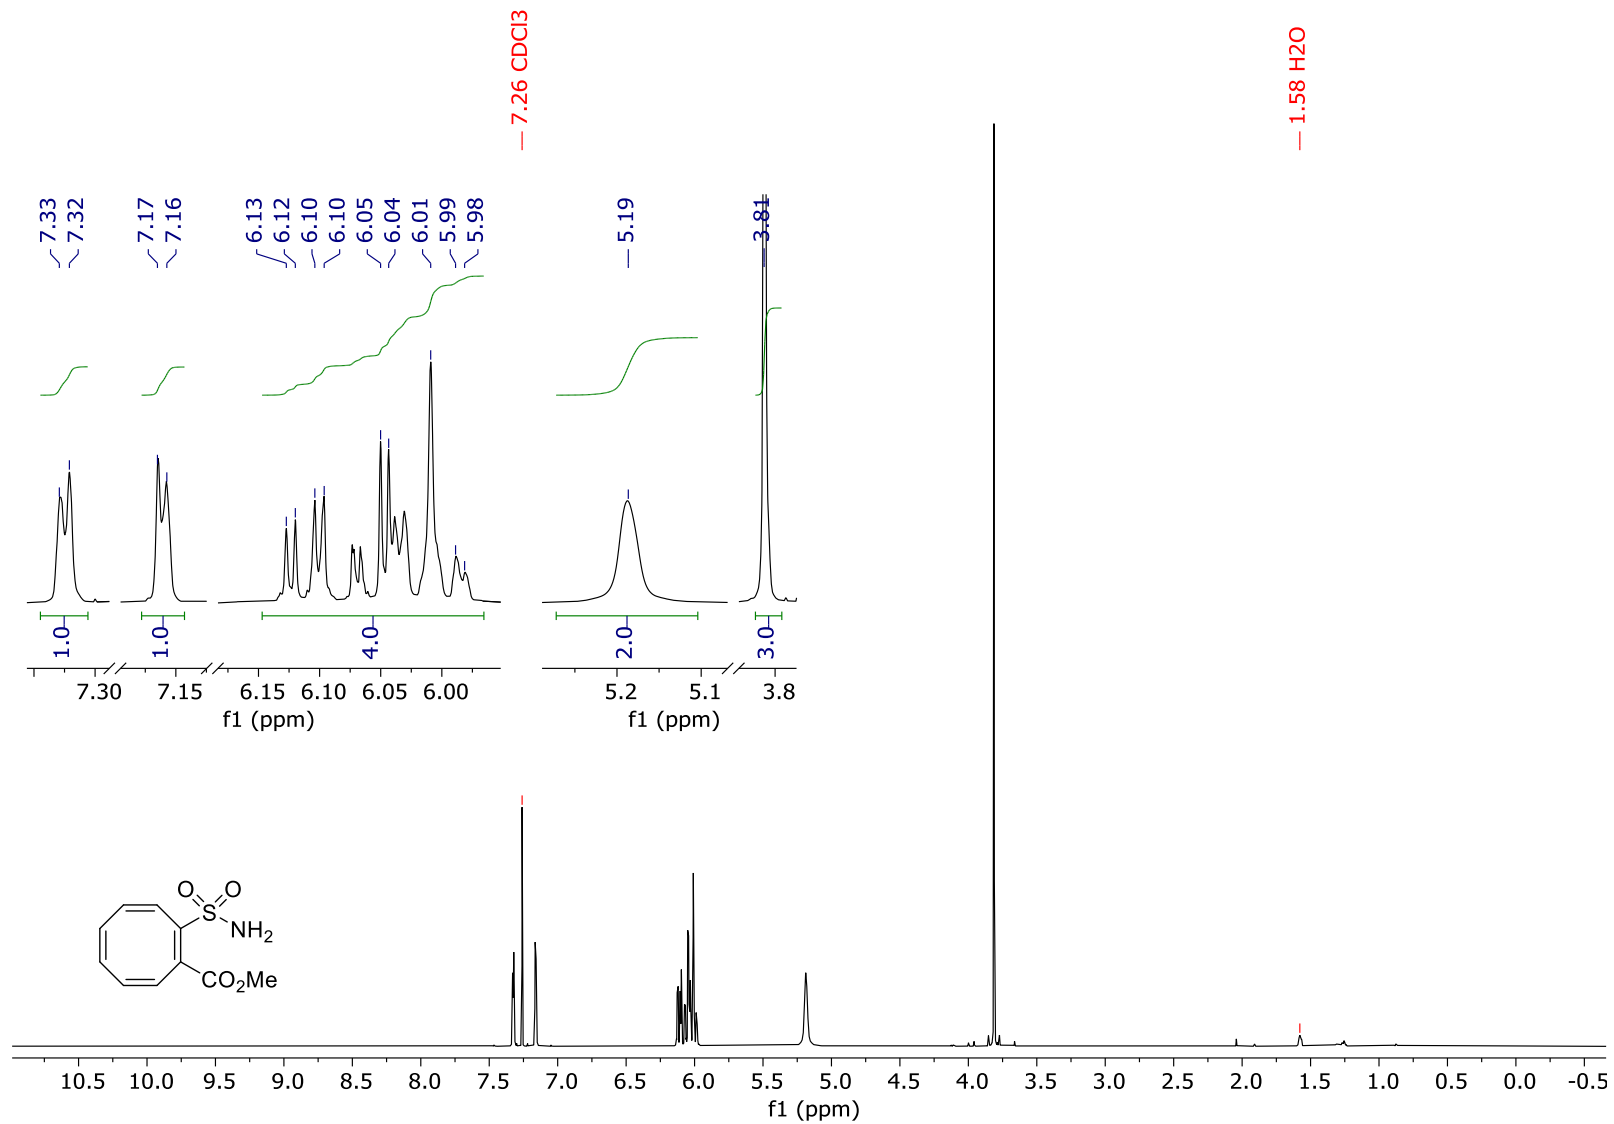

<sup>13</sup>C NMR (125 MHz, CDCl<sub>3</sub>) of Methyl 2-sulfamoylcycloocta-1,3,5,7-tetraene-1-carboxylate (24)

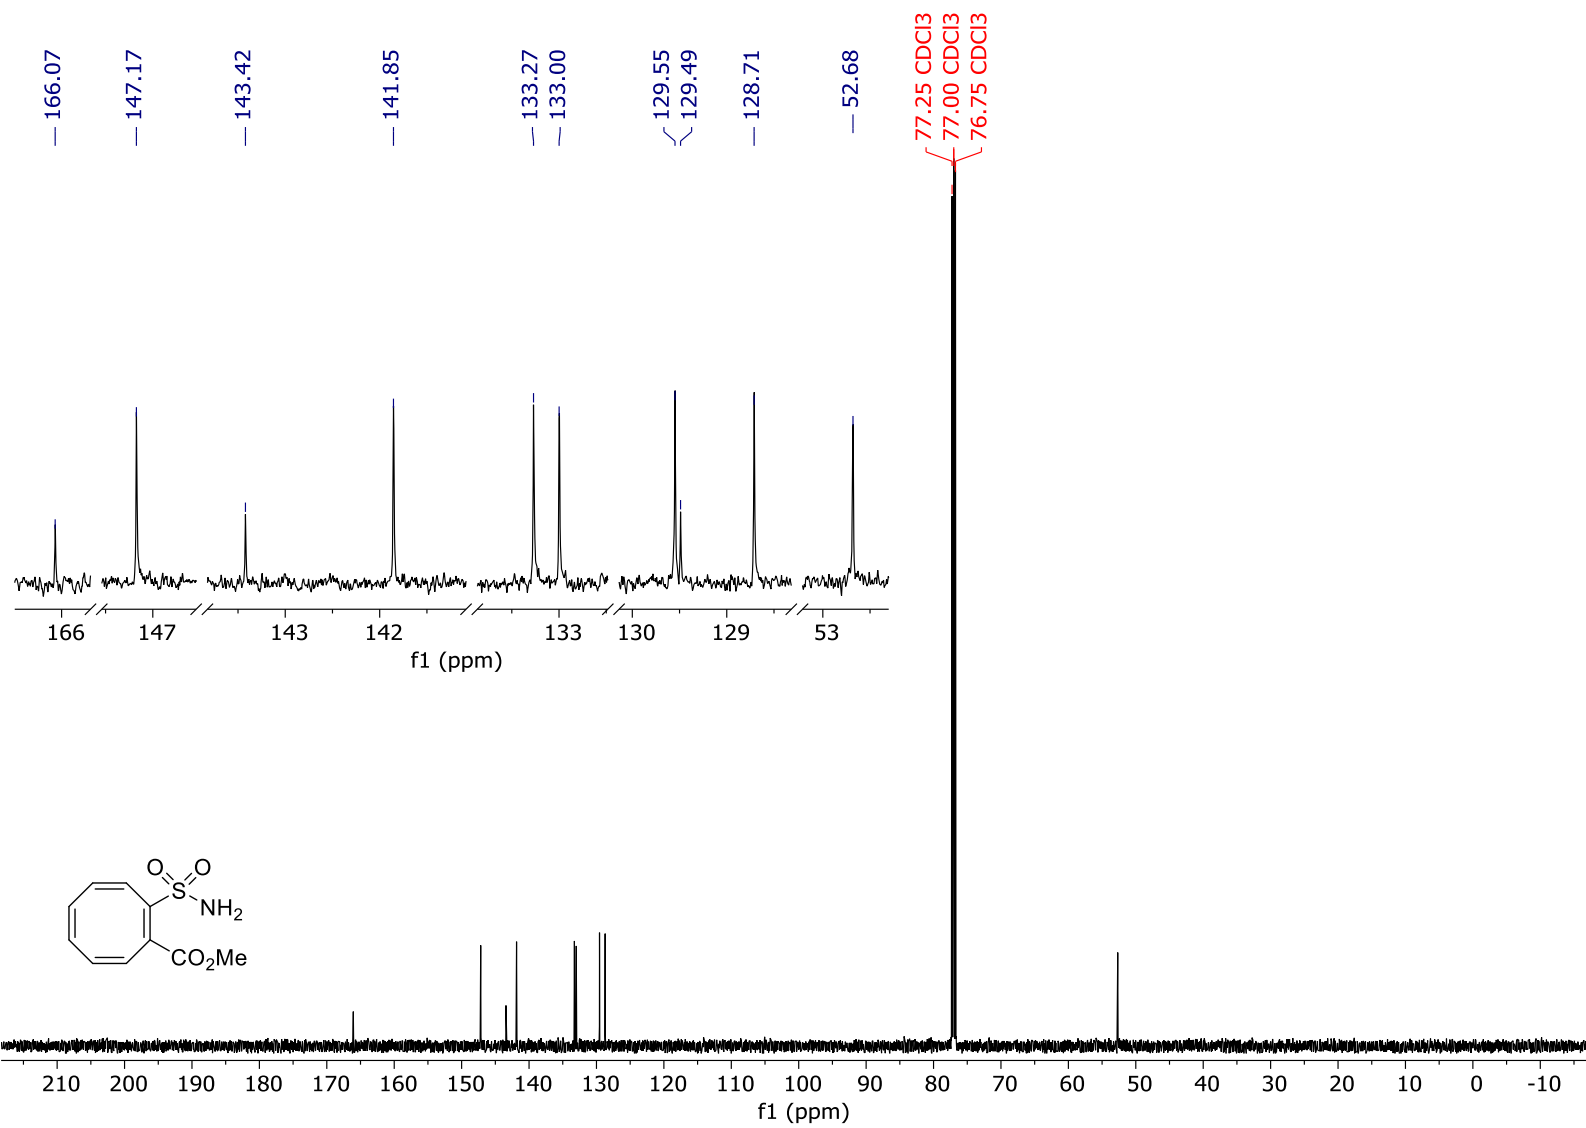

<sup>1</sup>H NMR (500 MHz, CD<sub>3</sub>CN) of Phenyl *N*-(4-methoxy-6-methyl-1,3,5-triazin-2-yl) (26)

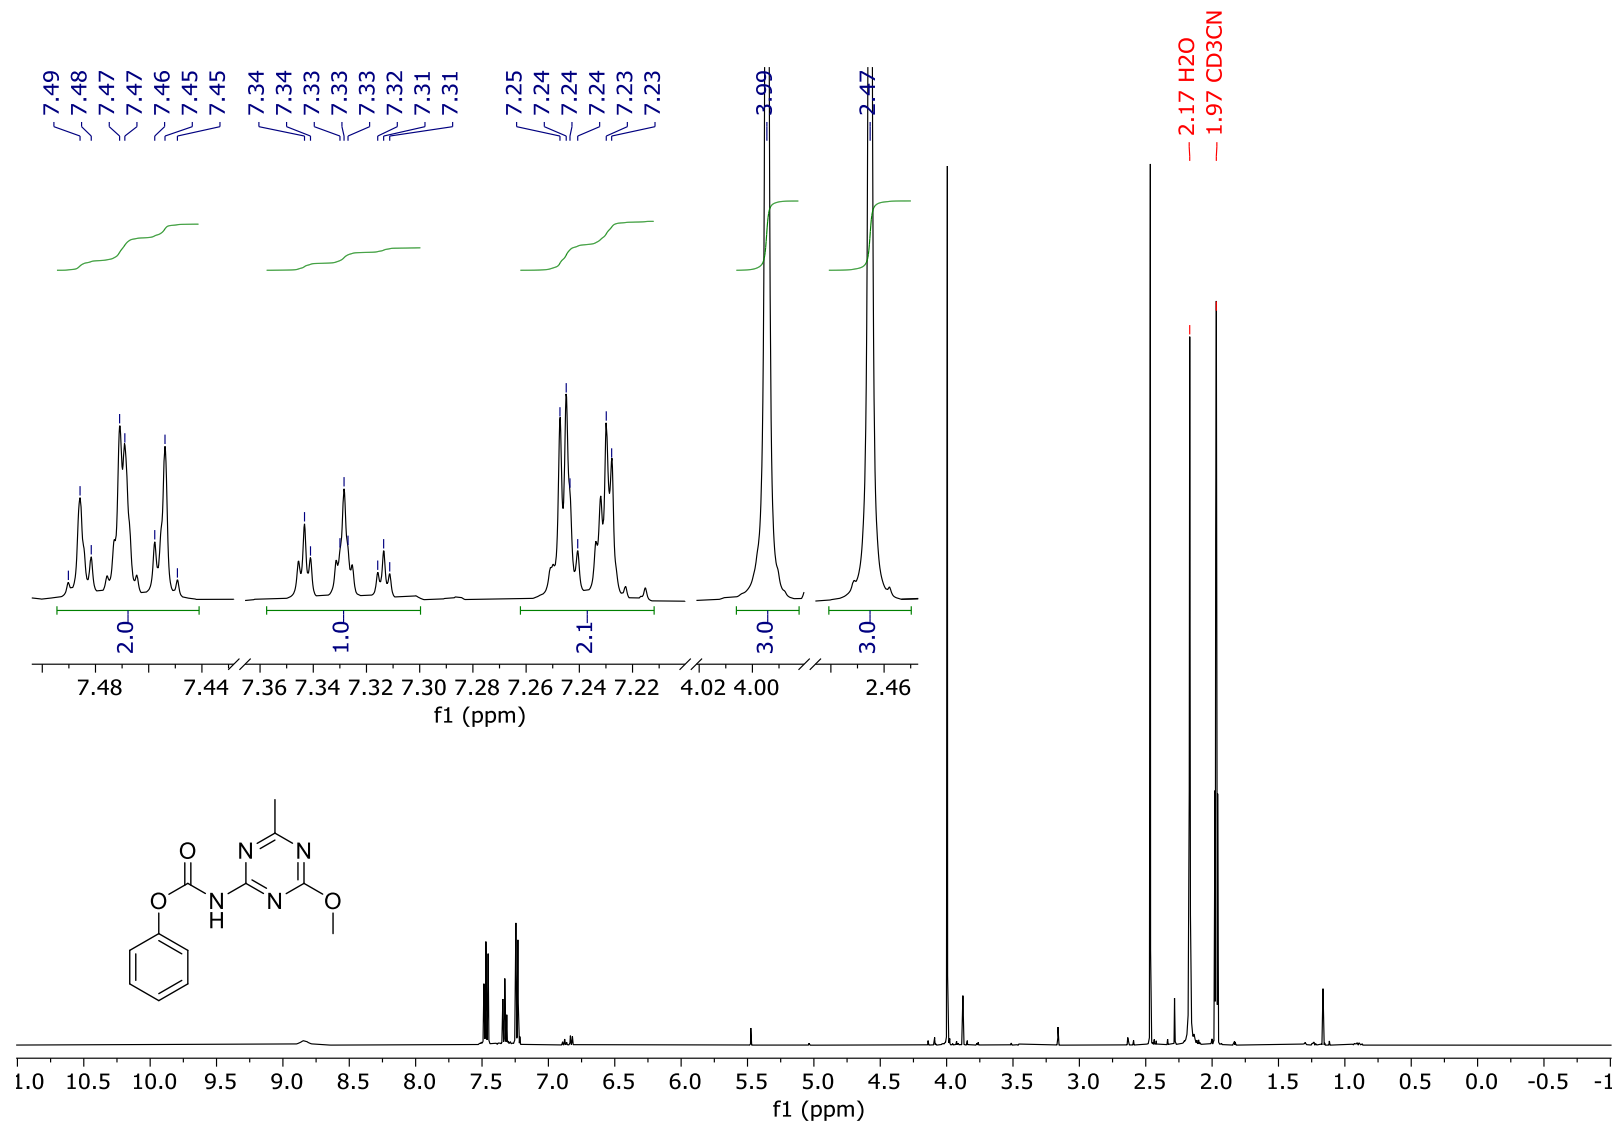

<sup>1</sup>H NMR (500 MHz, CDCl<sub>3</sub>) of COT-MM (10)

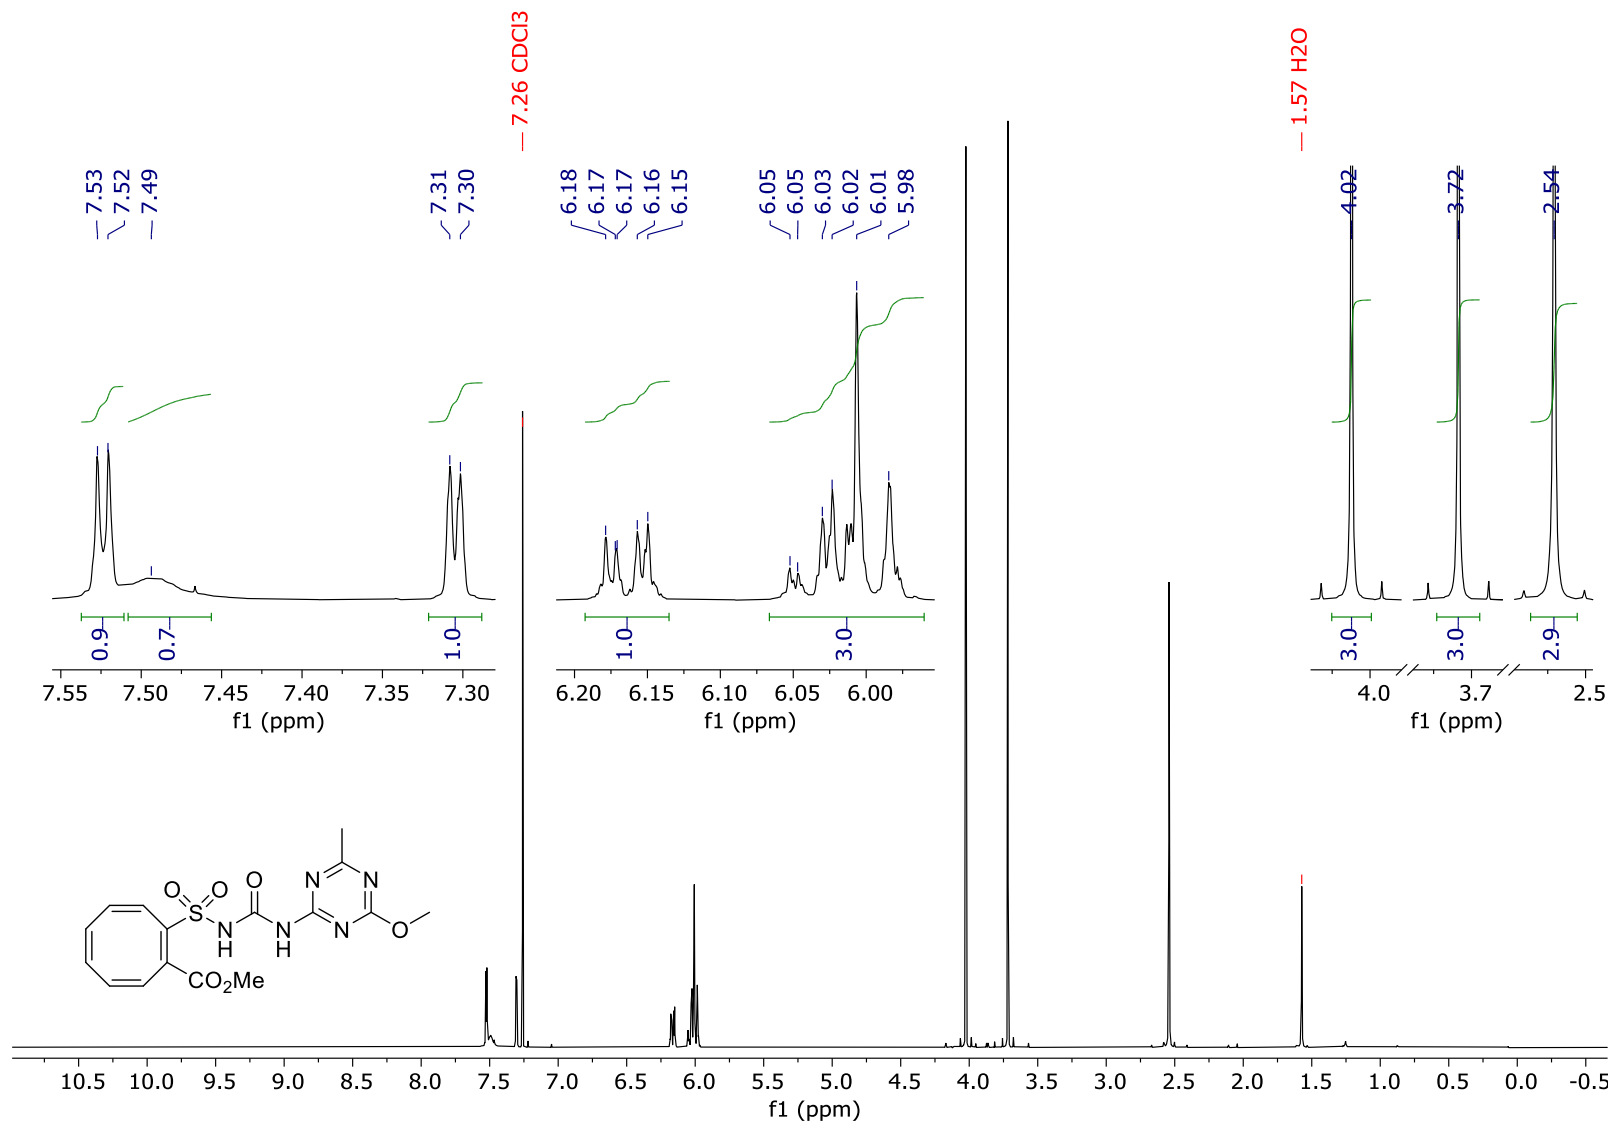

<sup>13</sup>C NMR (125 MHz, CDCl<sub>3</sub>) of COT-MM (10)

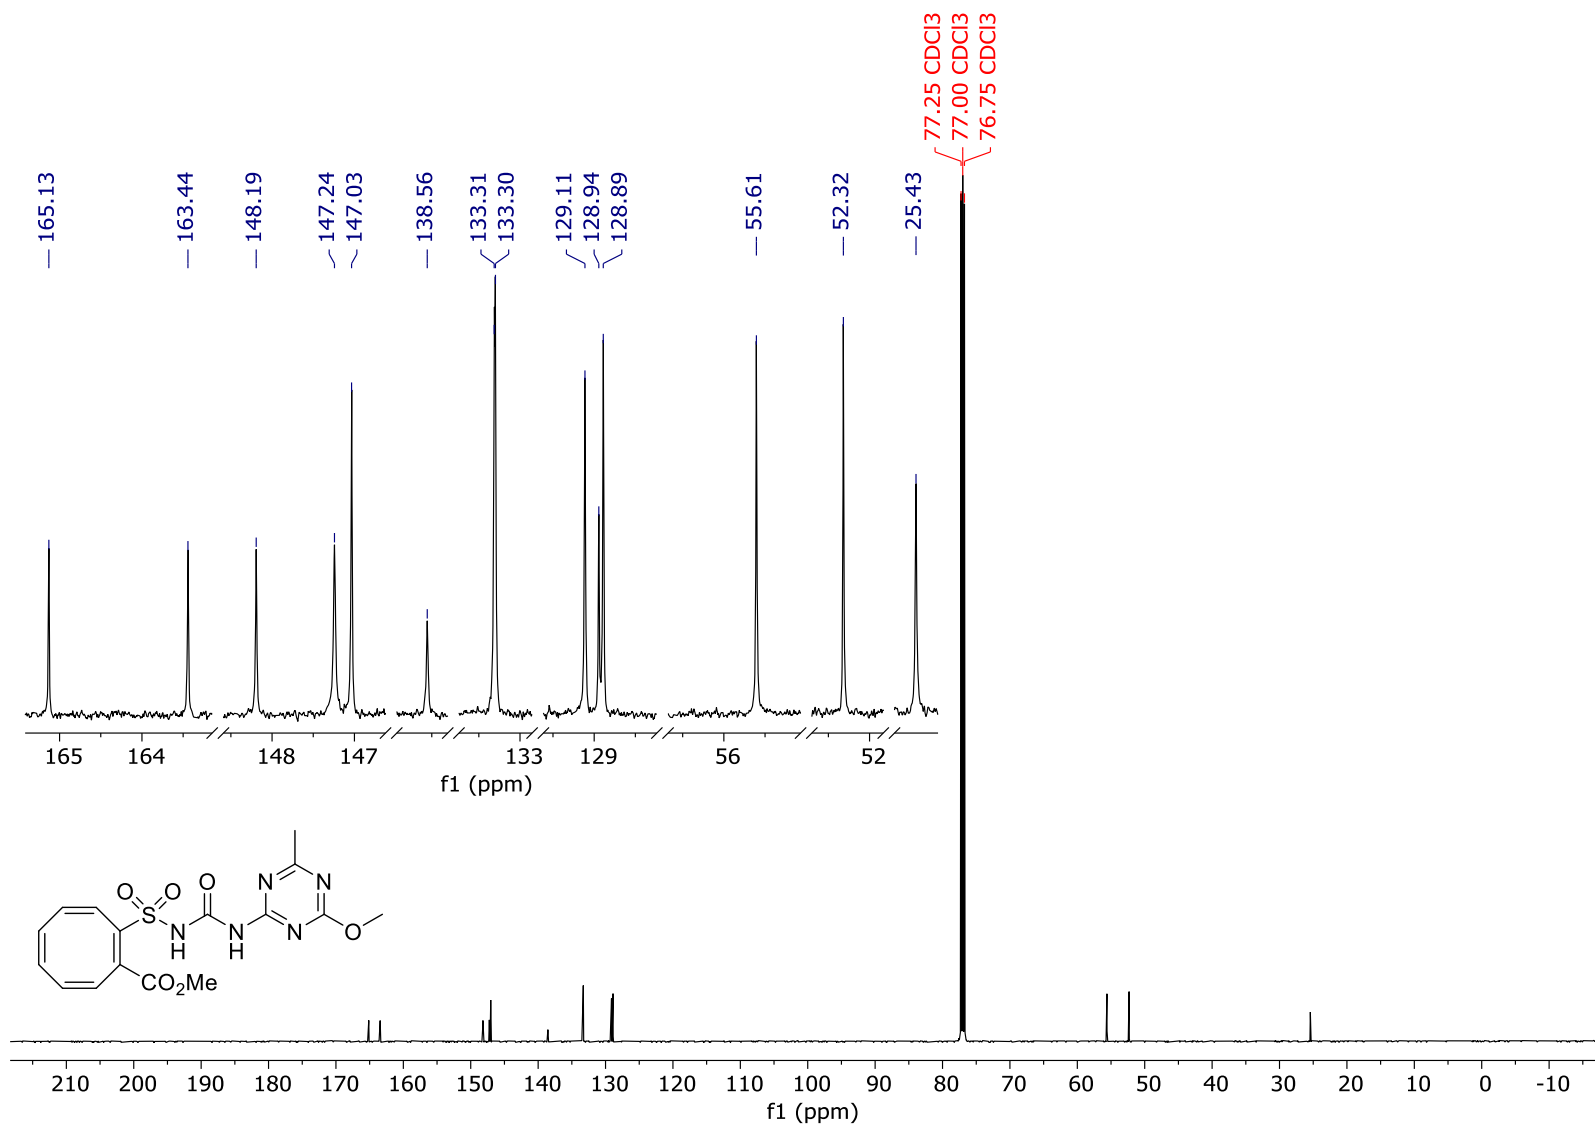



$^1\text{H}$  NMR (500 MHz,  $\text{D}_2\text{O}$ ) of COT-MM  $\text{K}^+$

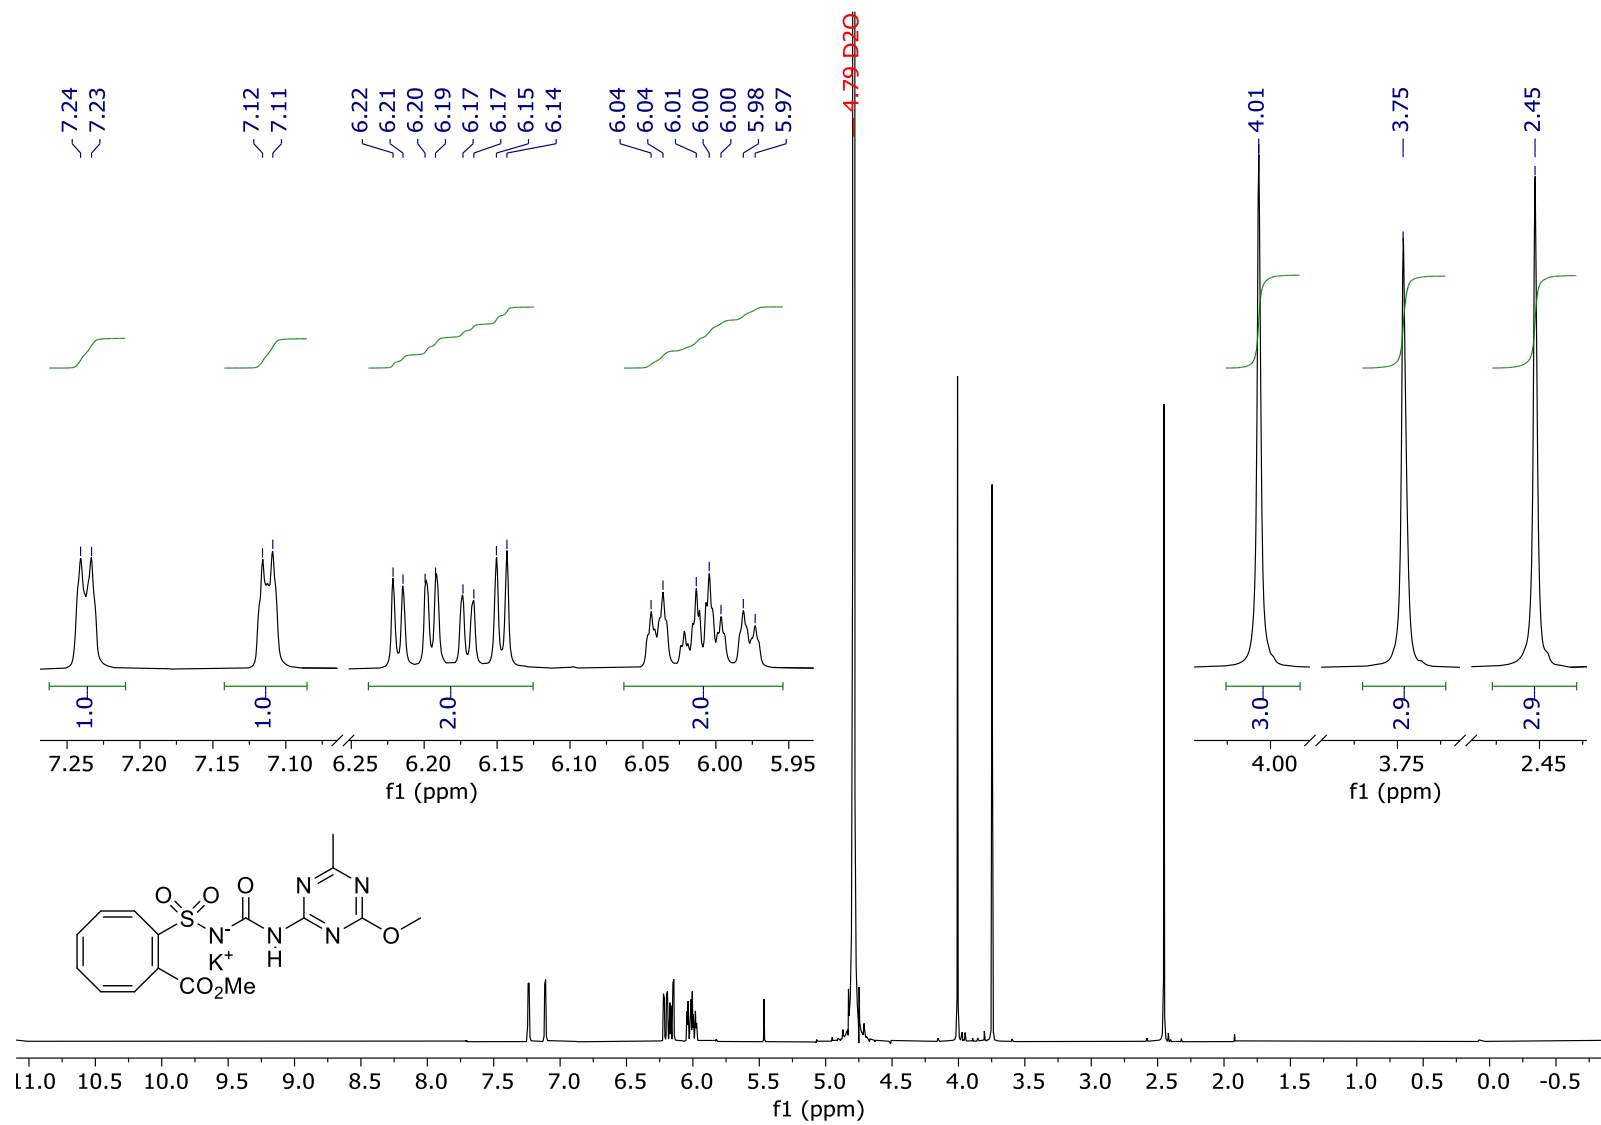

$^{13}\text{C}$  NMR (125 MHz,  $\text{D}_2\text{O}$ ) of **COT-MM K<sup>+</sup>**

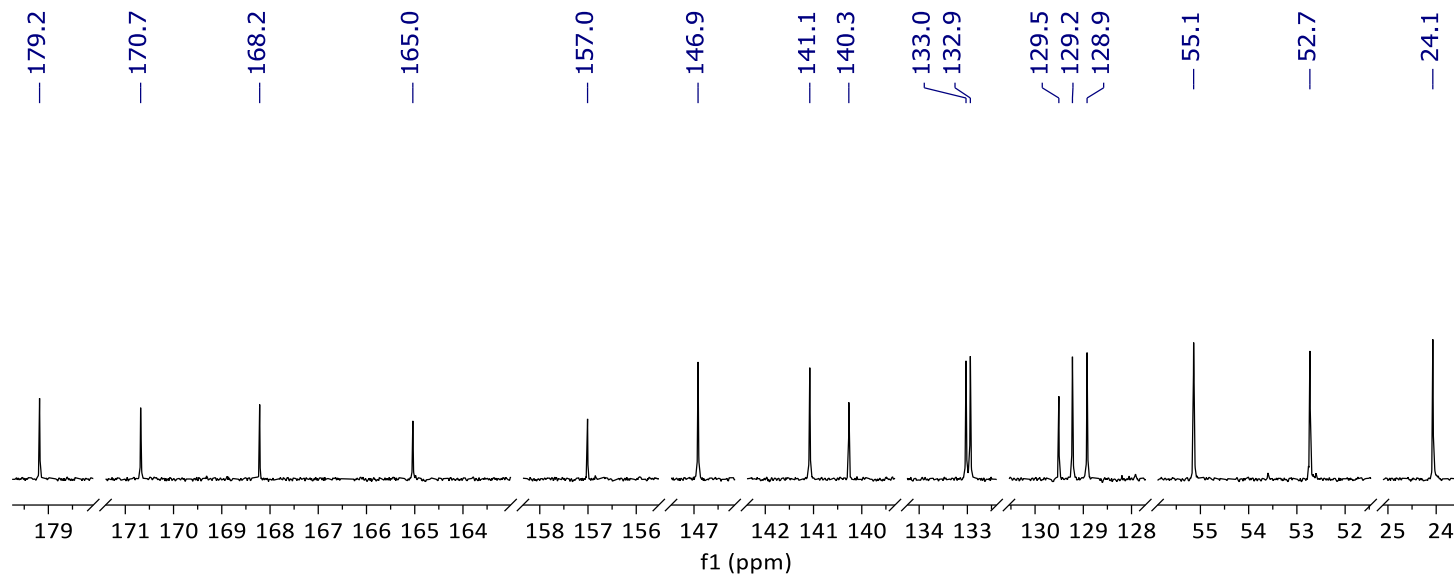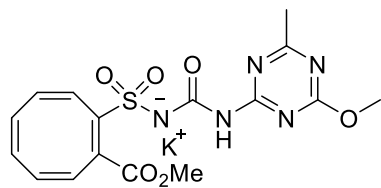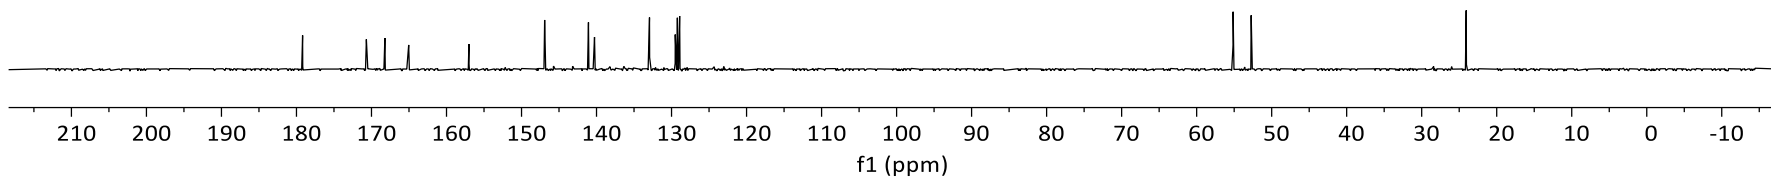

HRMS ESI of COT-MM K<sup>+</sup>

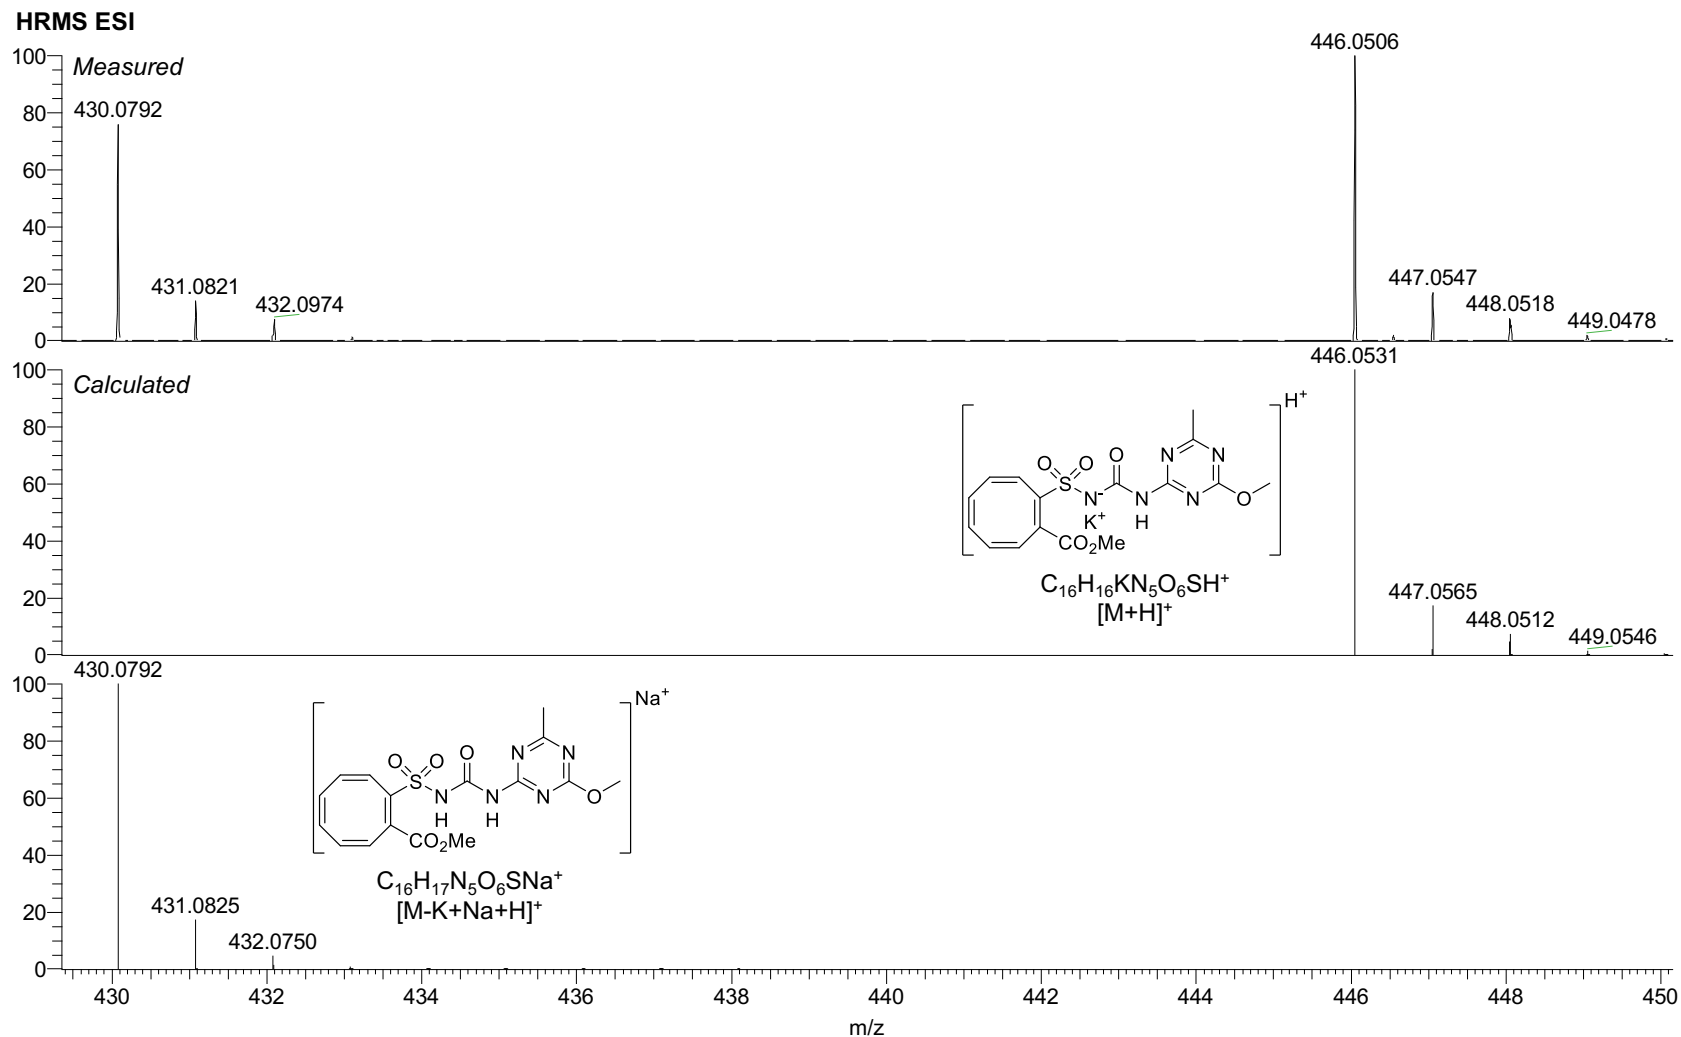

$^1\text{H}$  NMR (500 MHz,  $\text{D}_2\text{O}$ ) of  $\text{MM K}^+$

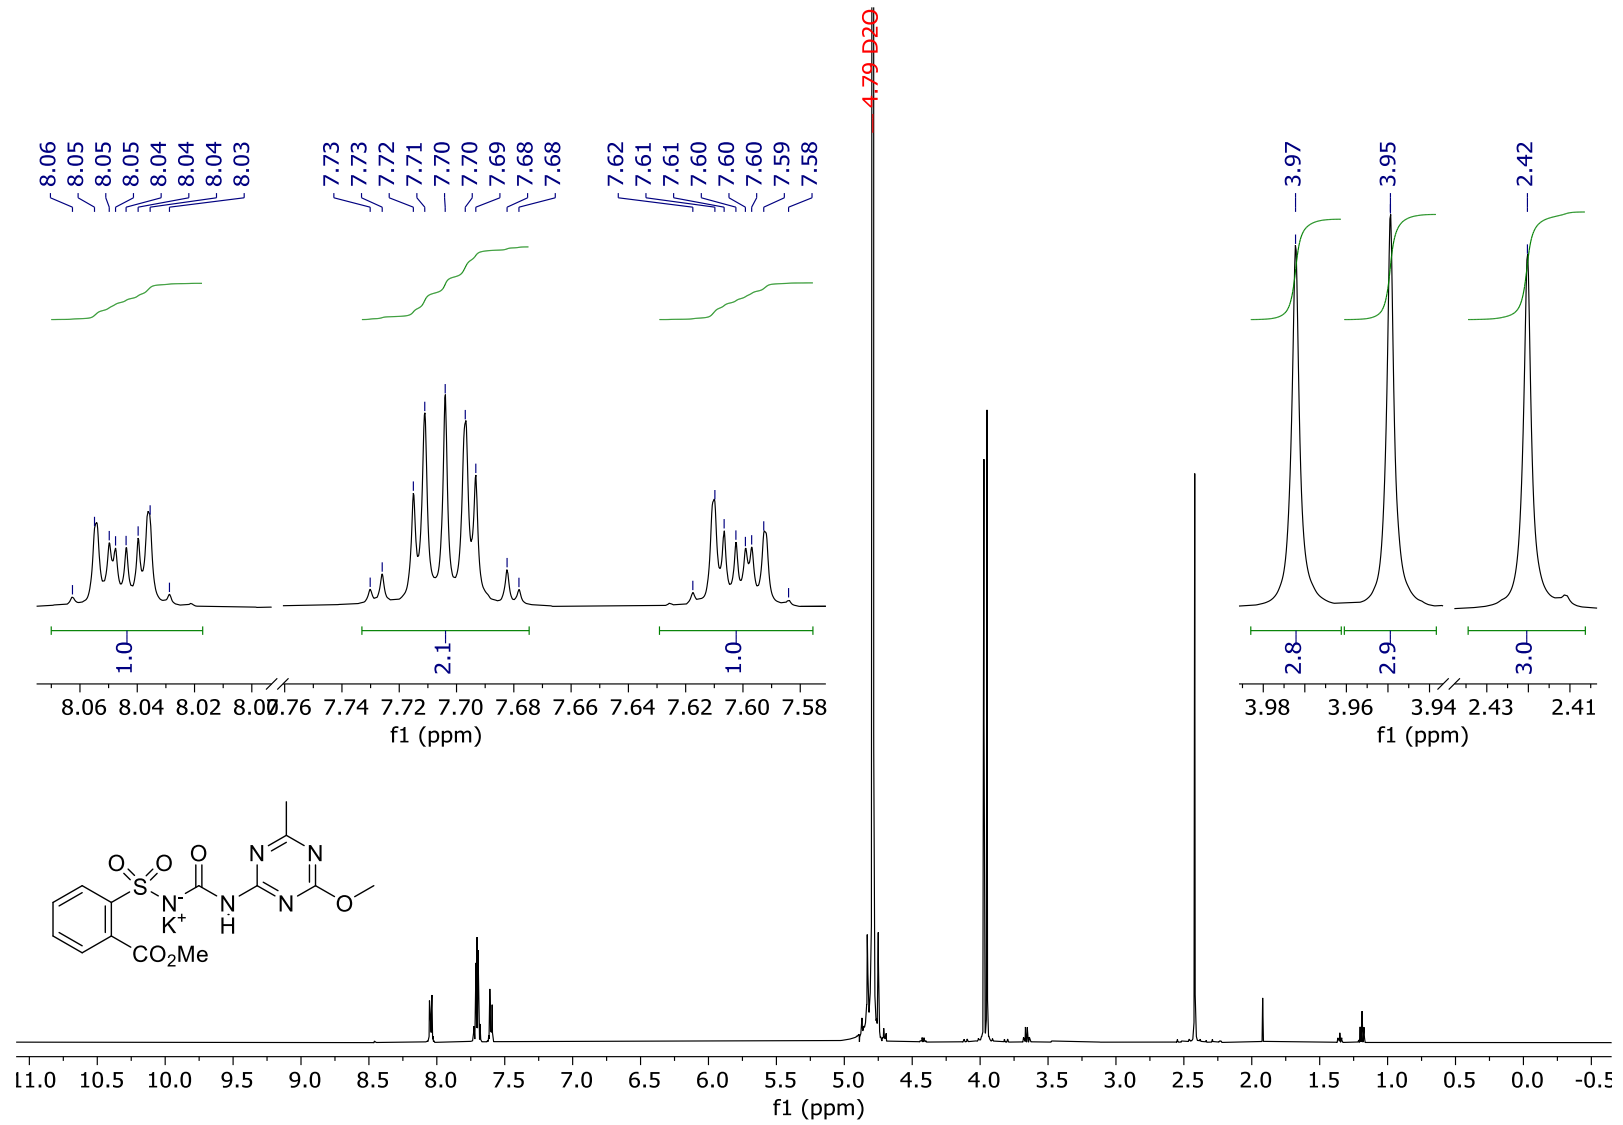

HRMS ESI of MM K<sup>+</sup>

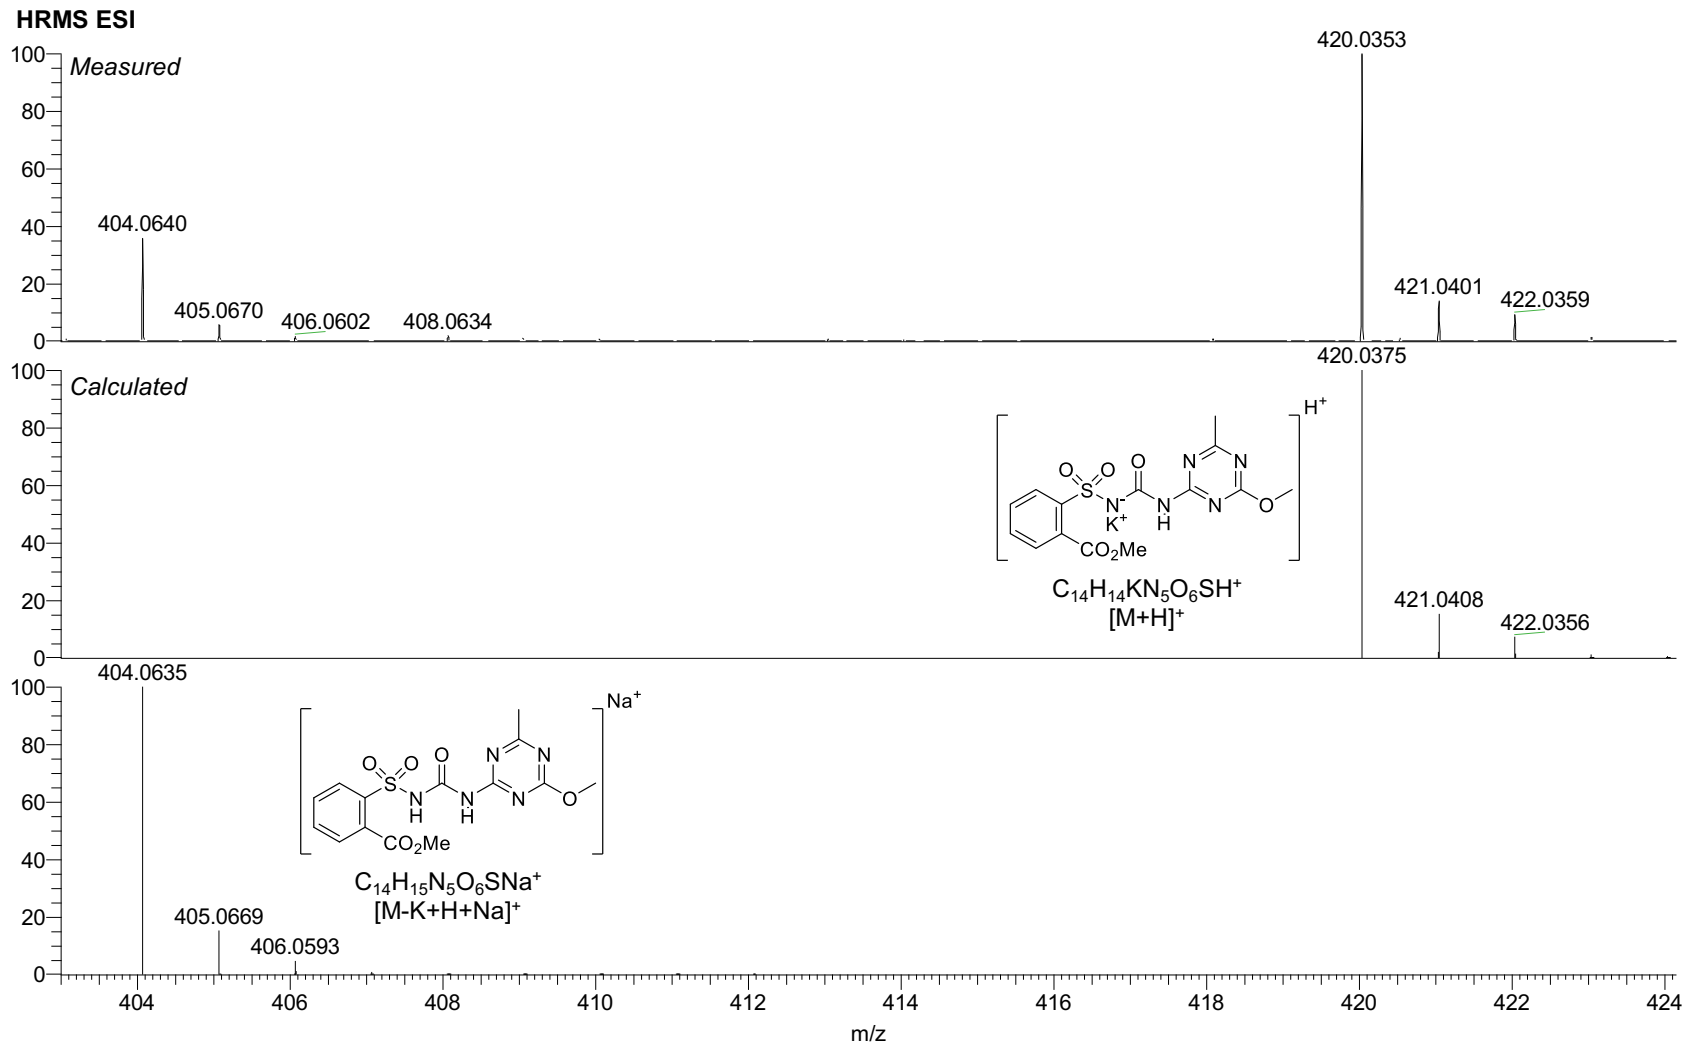

$^1\text{H}$  NMR (300 MHz,  $\text{CDCl}_3$ ) of Methyl 4-chlorocubane-1-carboxylate (33)

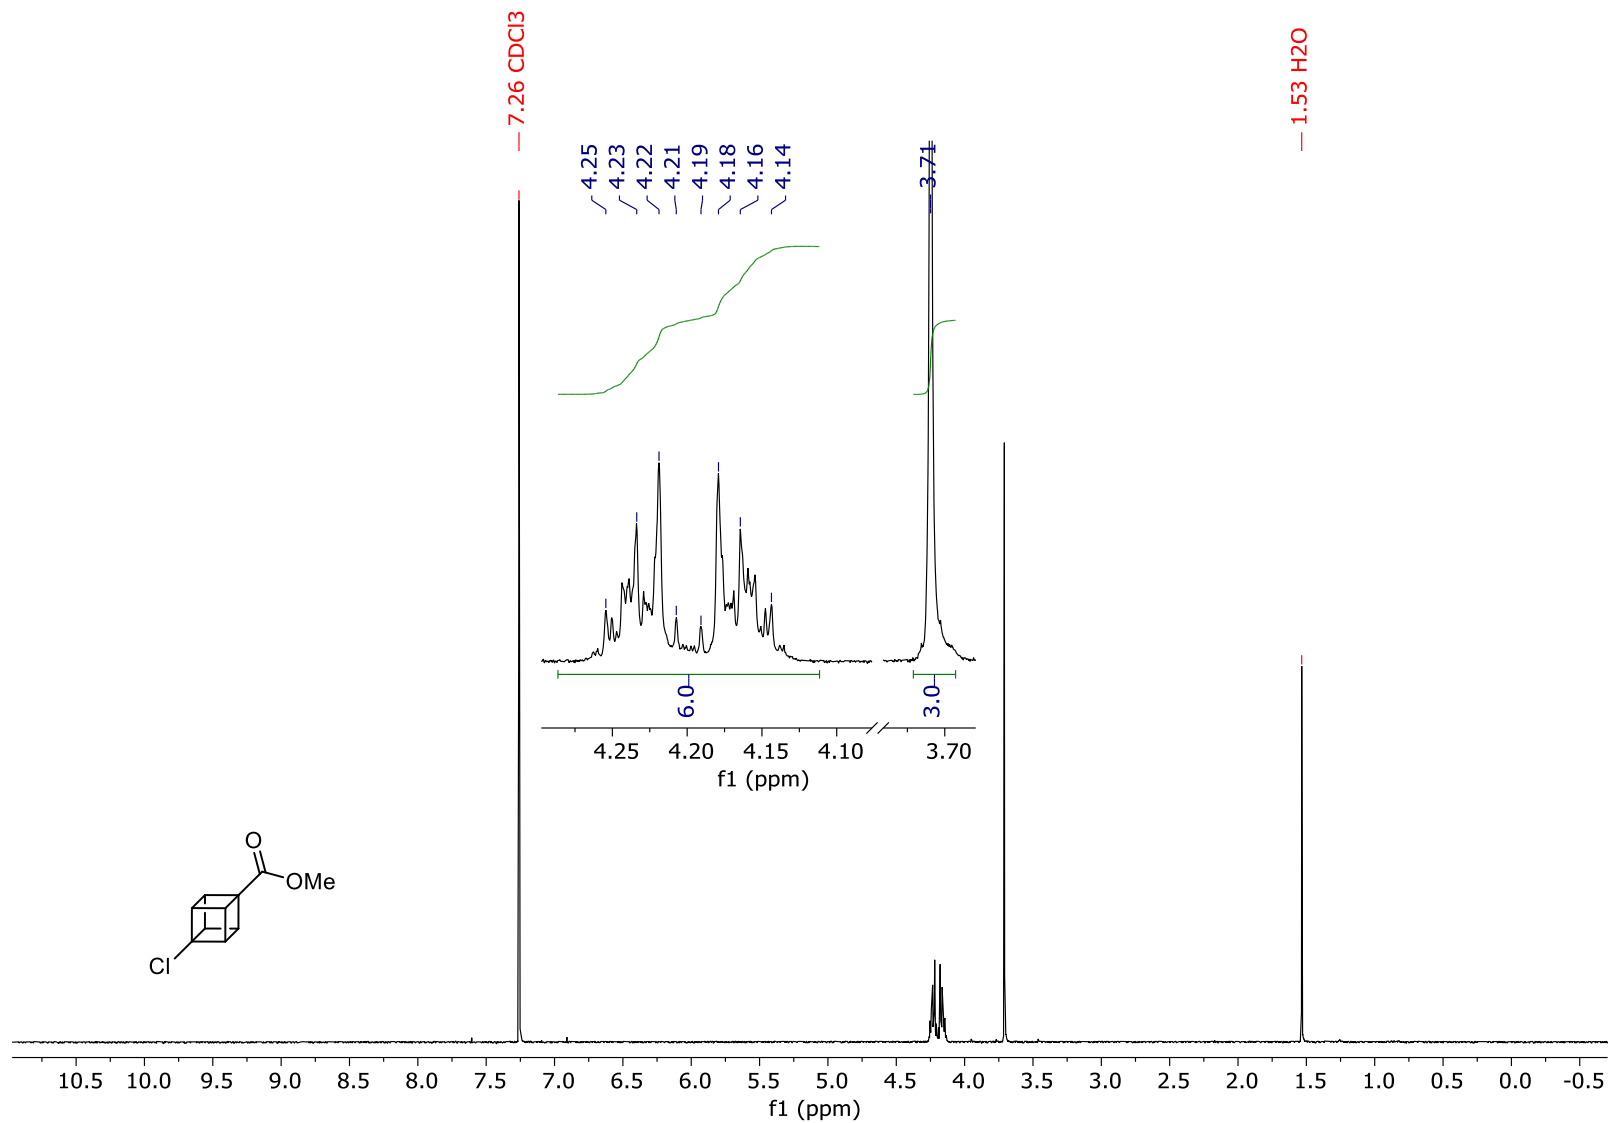

<sup>1</sup>H NMR (500 MHz, CDCl<sub>3</sub>) of (4-chlorocuban-1-yl)methanol (34)

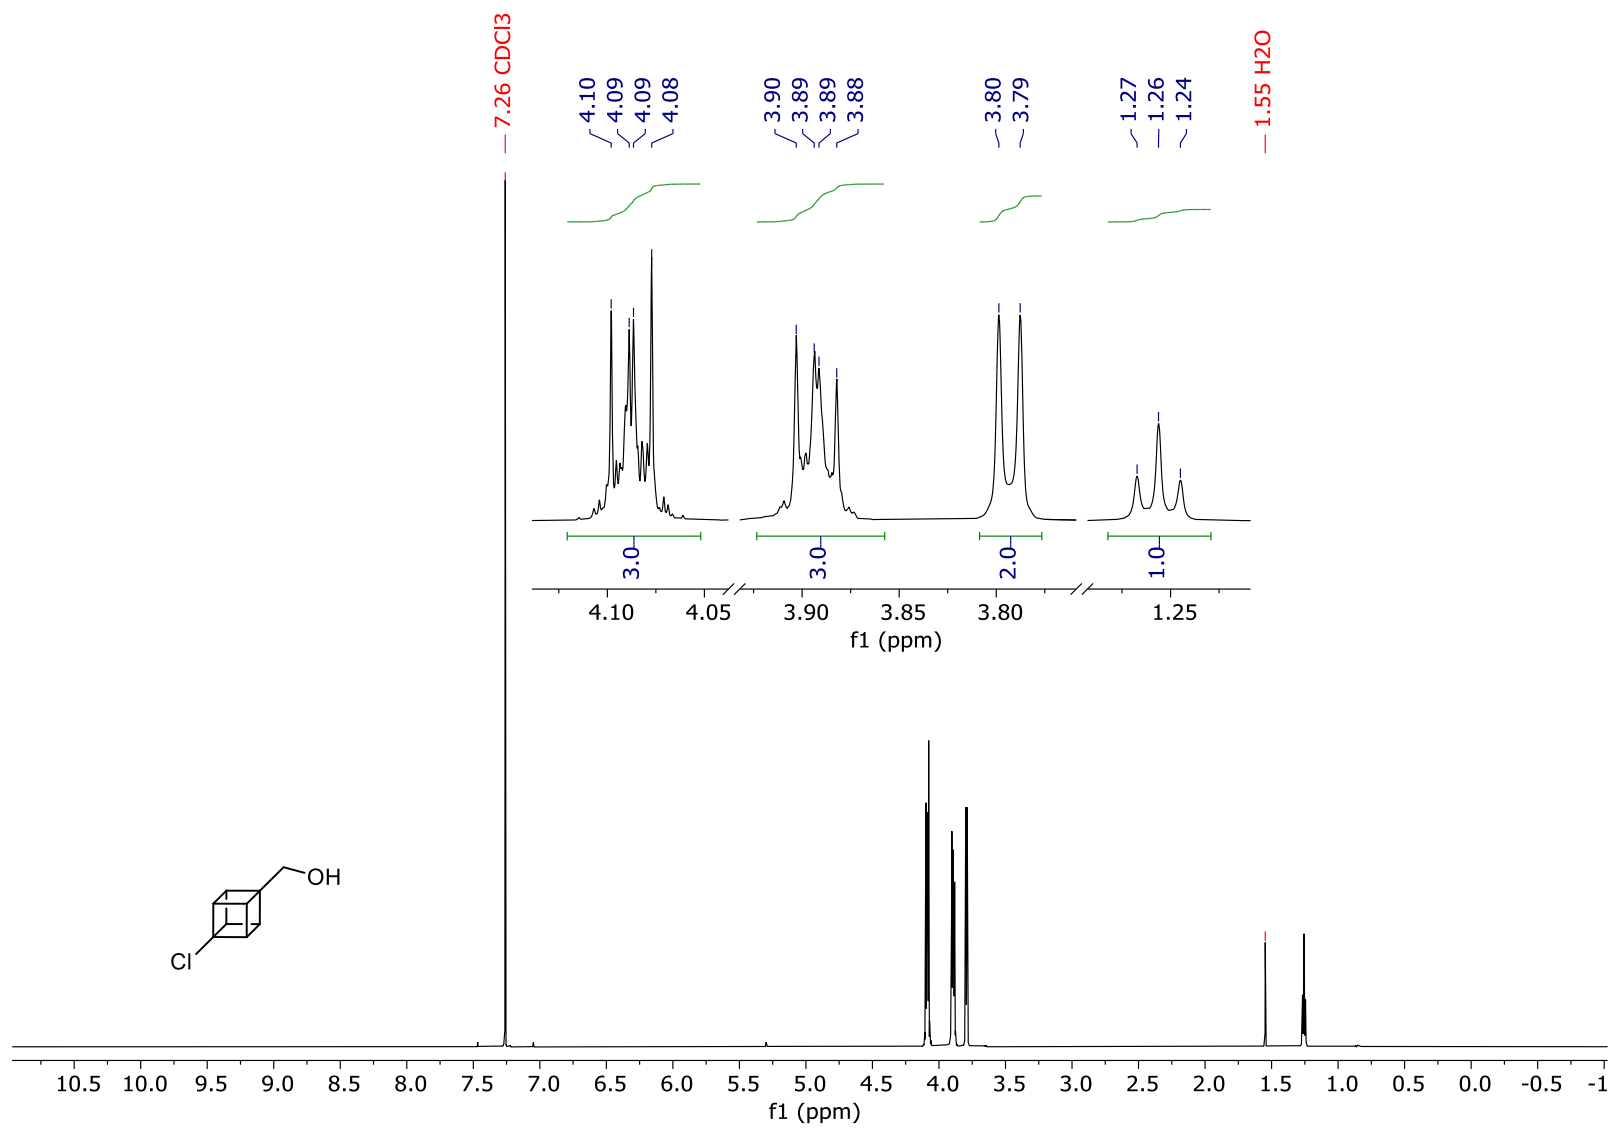

$^{13}\text{C}$  NMR (125 MHz,  $\text{CDCl}_3$ ) of (4-chlorocuban-1-yl)methanol (34)

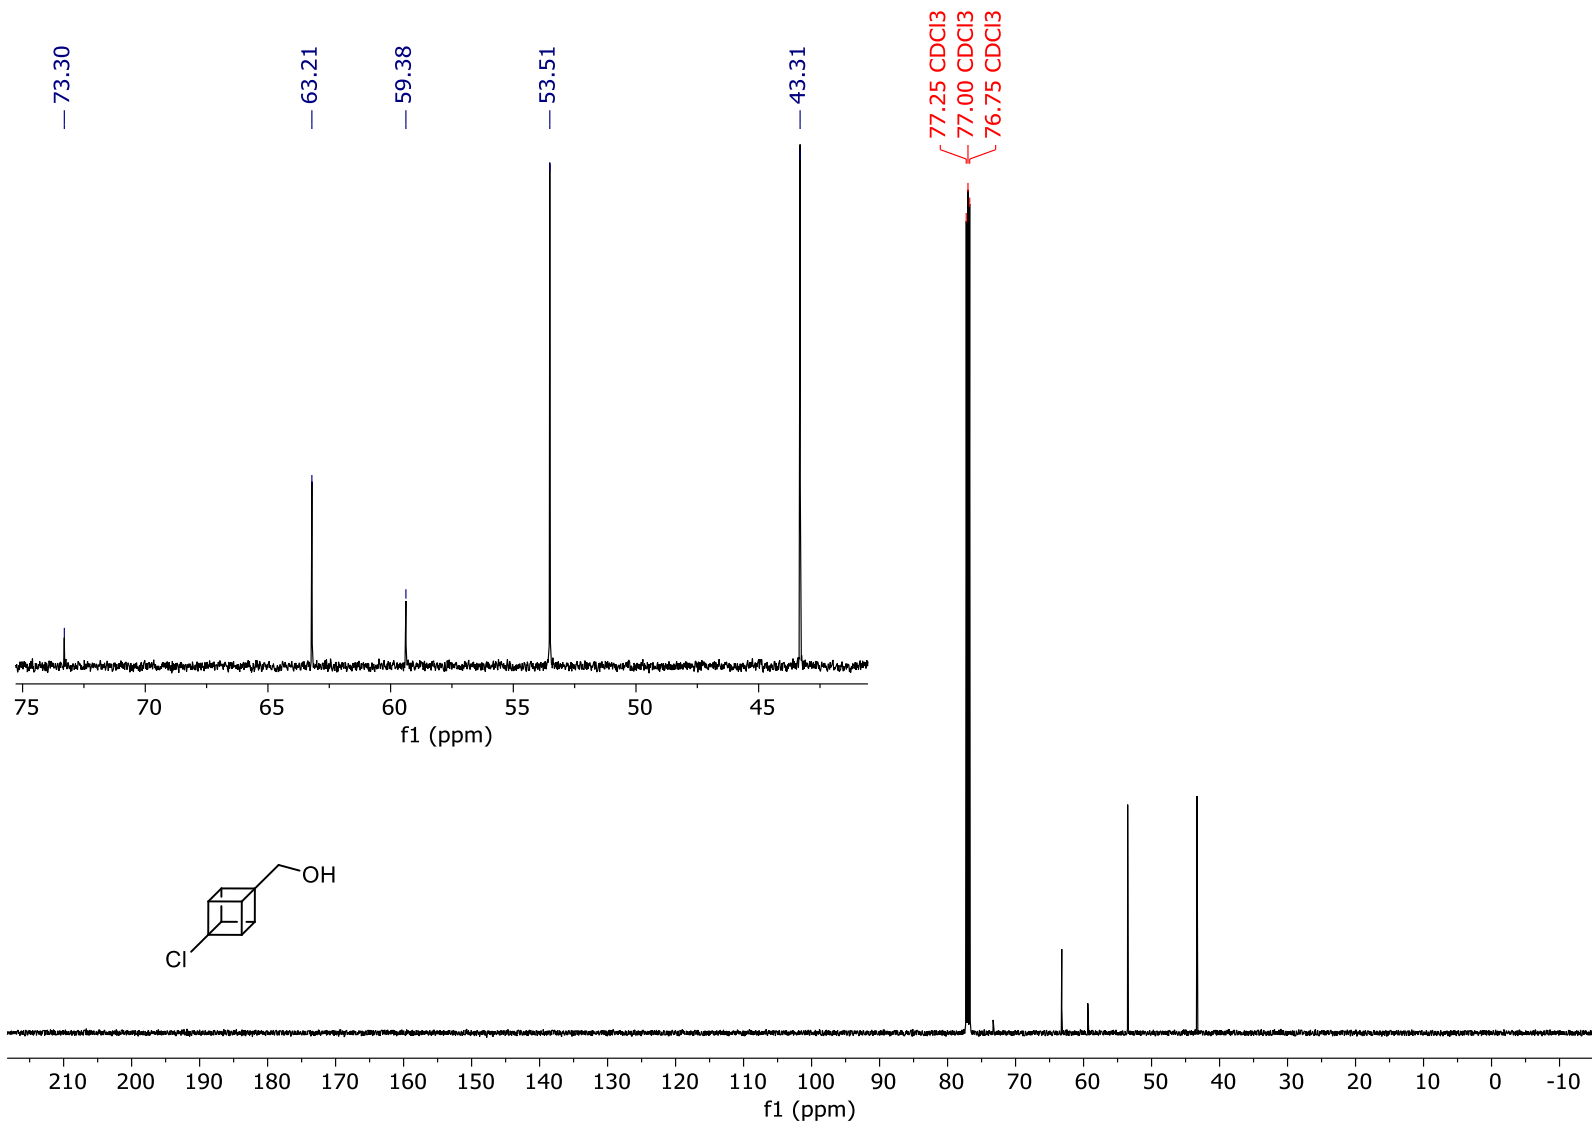



<sup>1</sup>H NMR (500 MHz, CDCl<sub>3</sub>) of ((4-Chlorocuban-1-yl)methyl) ethanethioate (35)

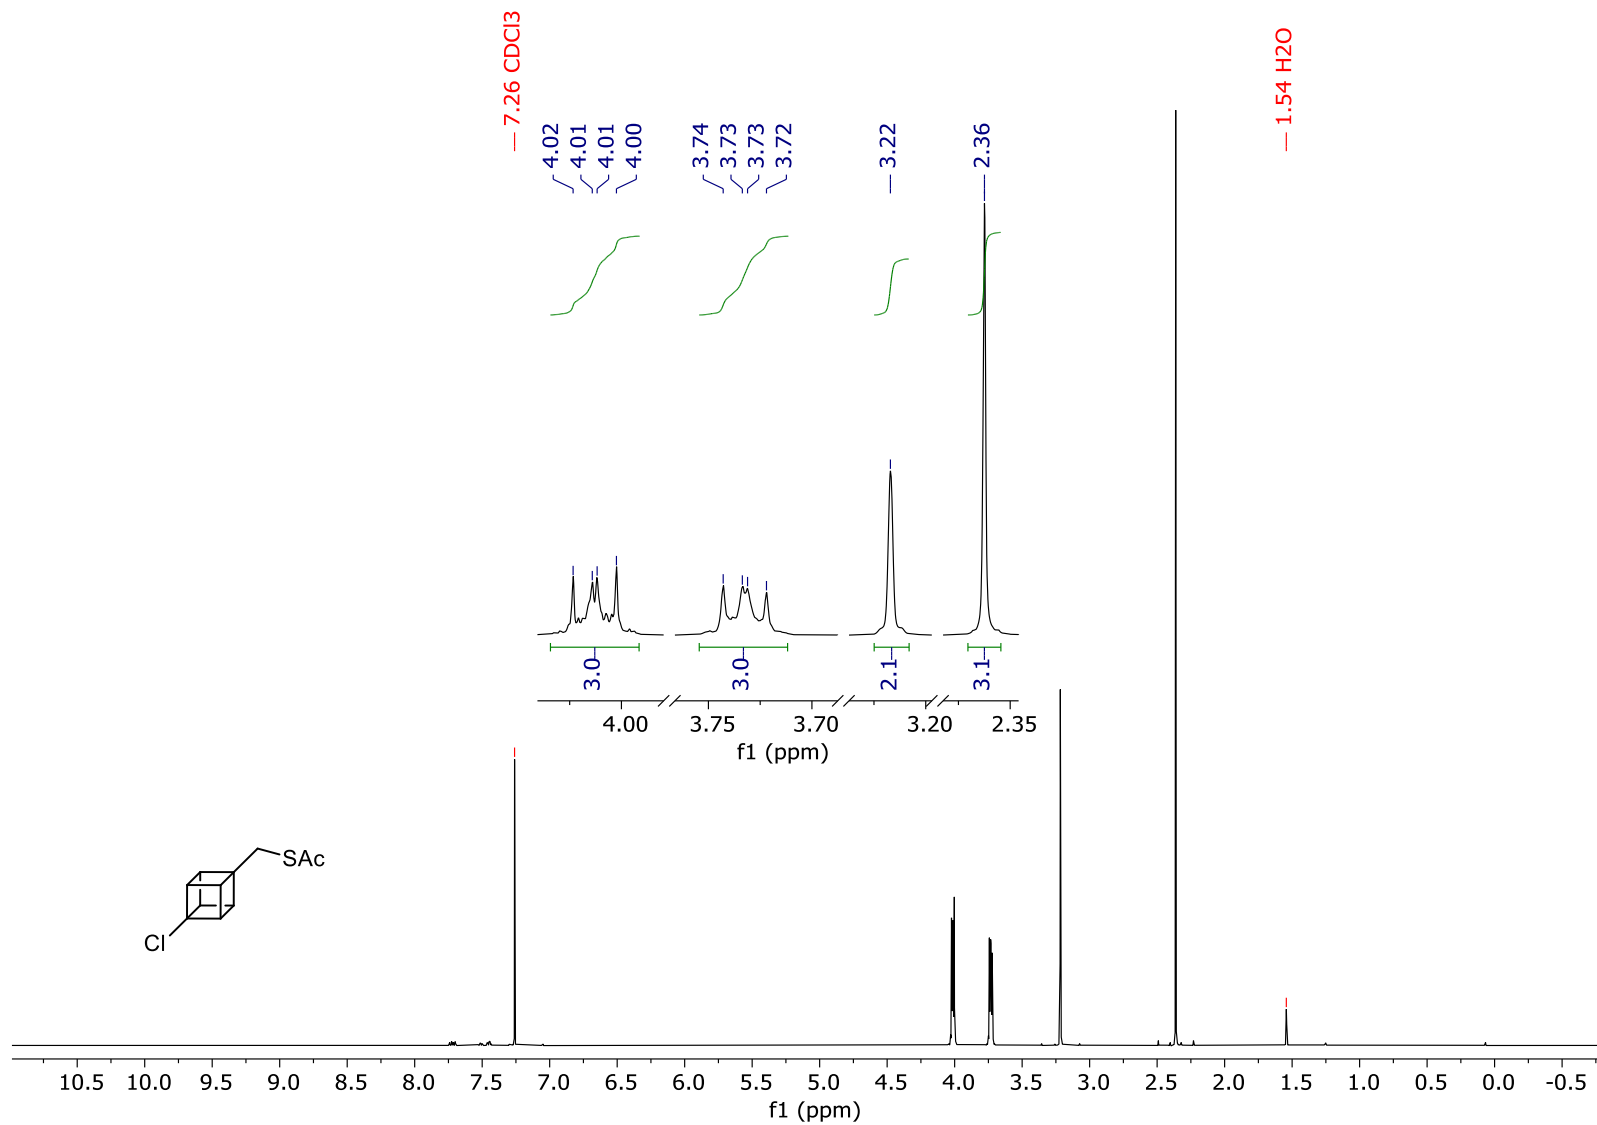

$^{13}\text{C}$  NMR (125 MHz,  $\text{CDCl}_3$ ) of ((4-Chlorocuban-1-yl)methyl) ethanethioate (35)

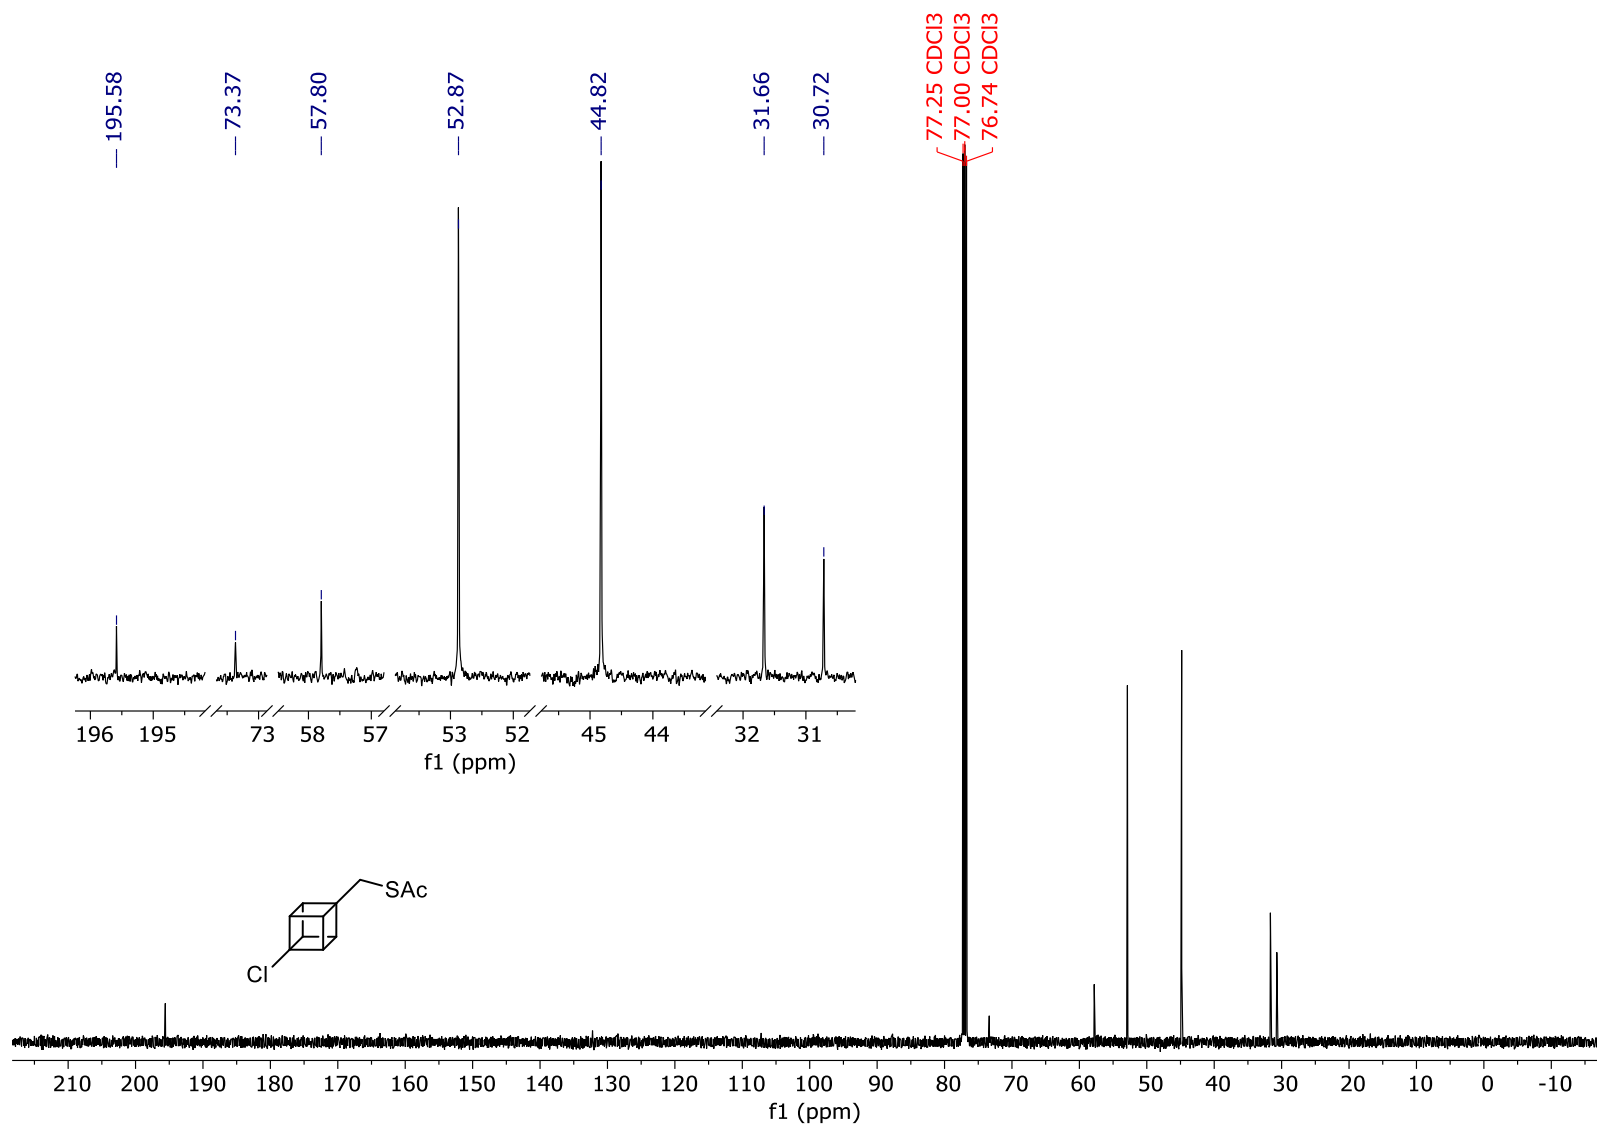

<sup>1</sup>H NMR (500 MHz, CDCl<sub>3</sub>) of (4-chlorocuban-1-yl)methanethiol (36)

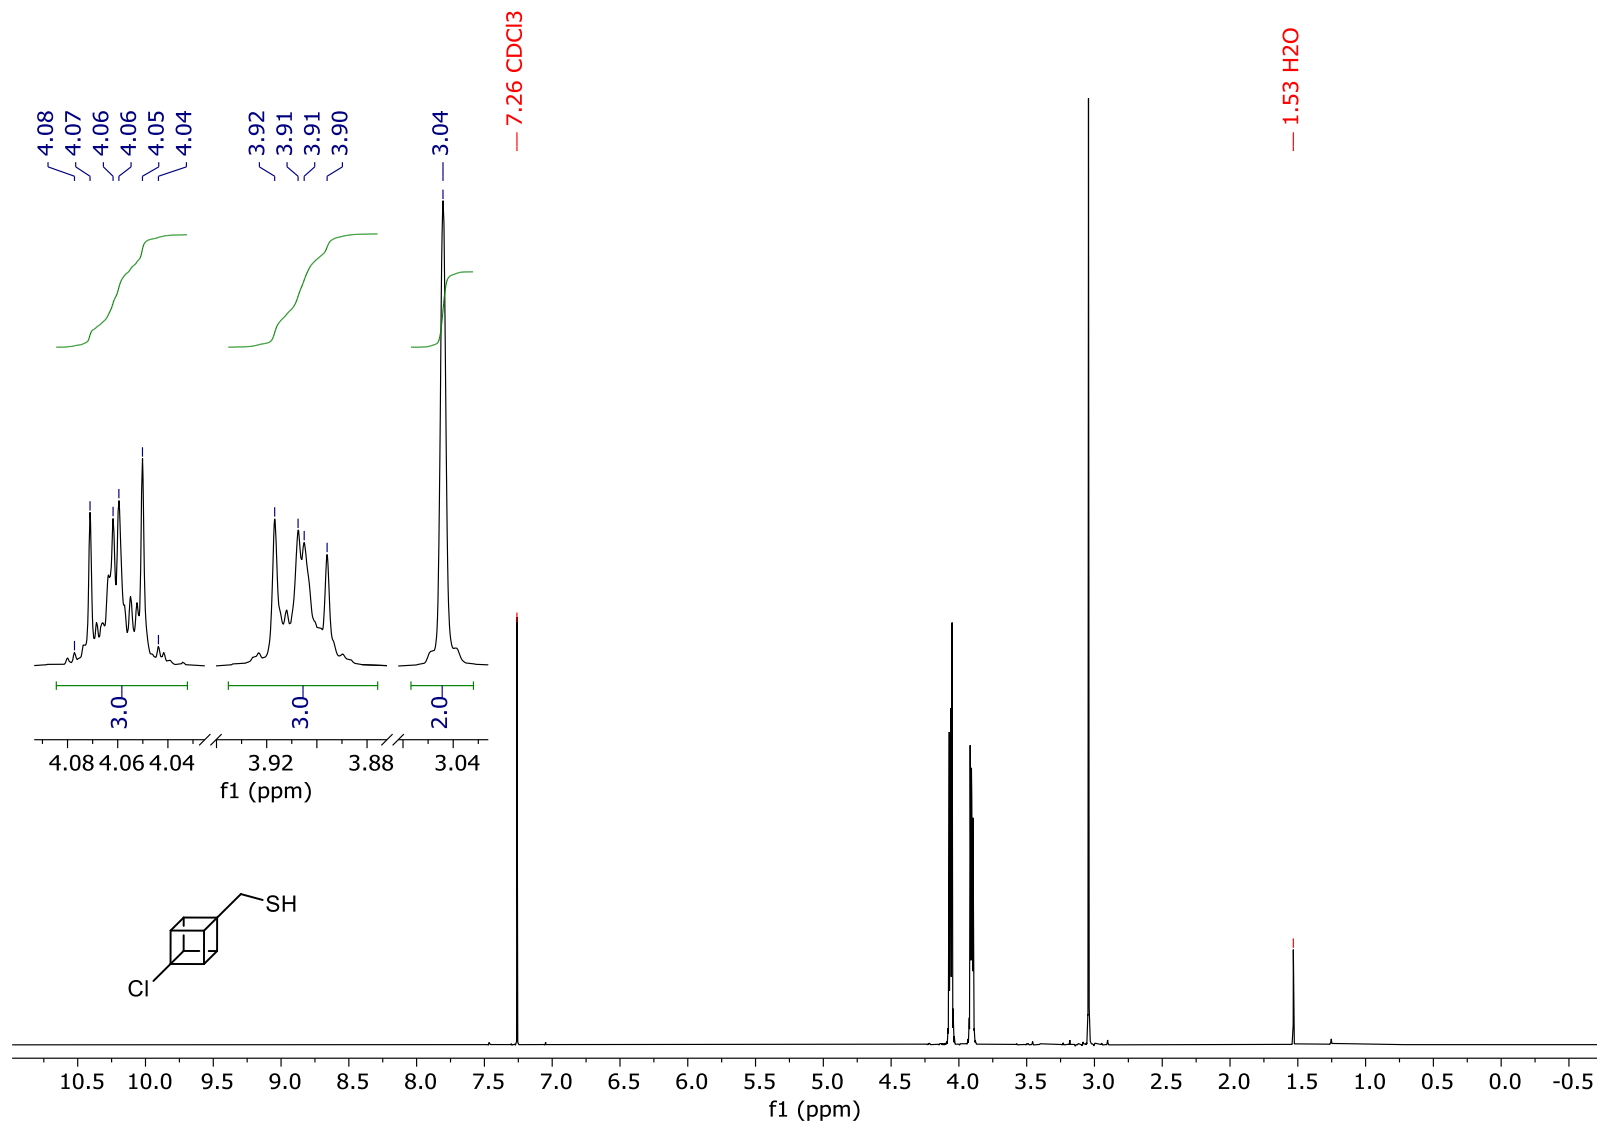

$^{13}\text{C}$  NMR (125 MHz,  $\text{CDCl}_3$ ) of (4-chlorocuban-1-yl)methanethiol (36)

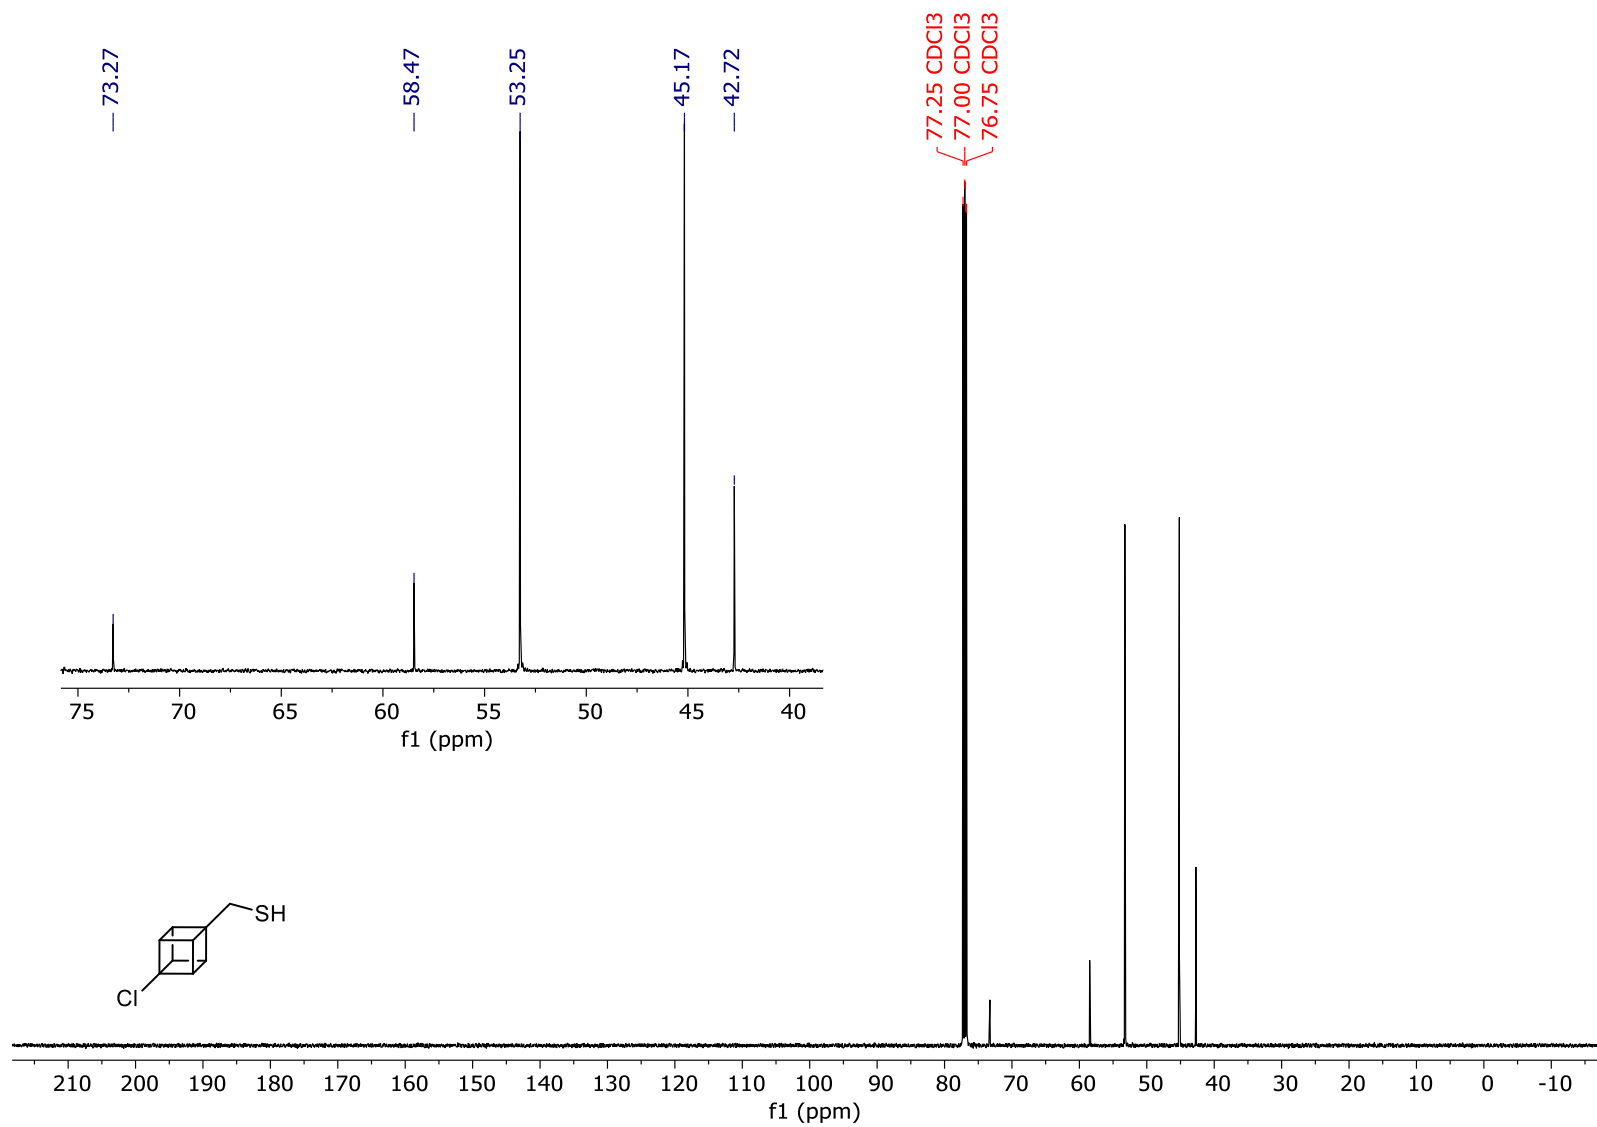

<sup>1</sup>H NMR (500 MHz, CDCl<sub>3</sub>) of ((4-Chlorocuban-1-yl)methyl)diethylcarbamothioate (38)

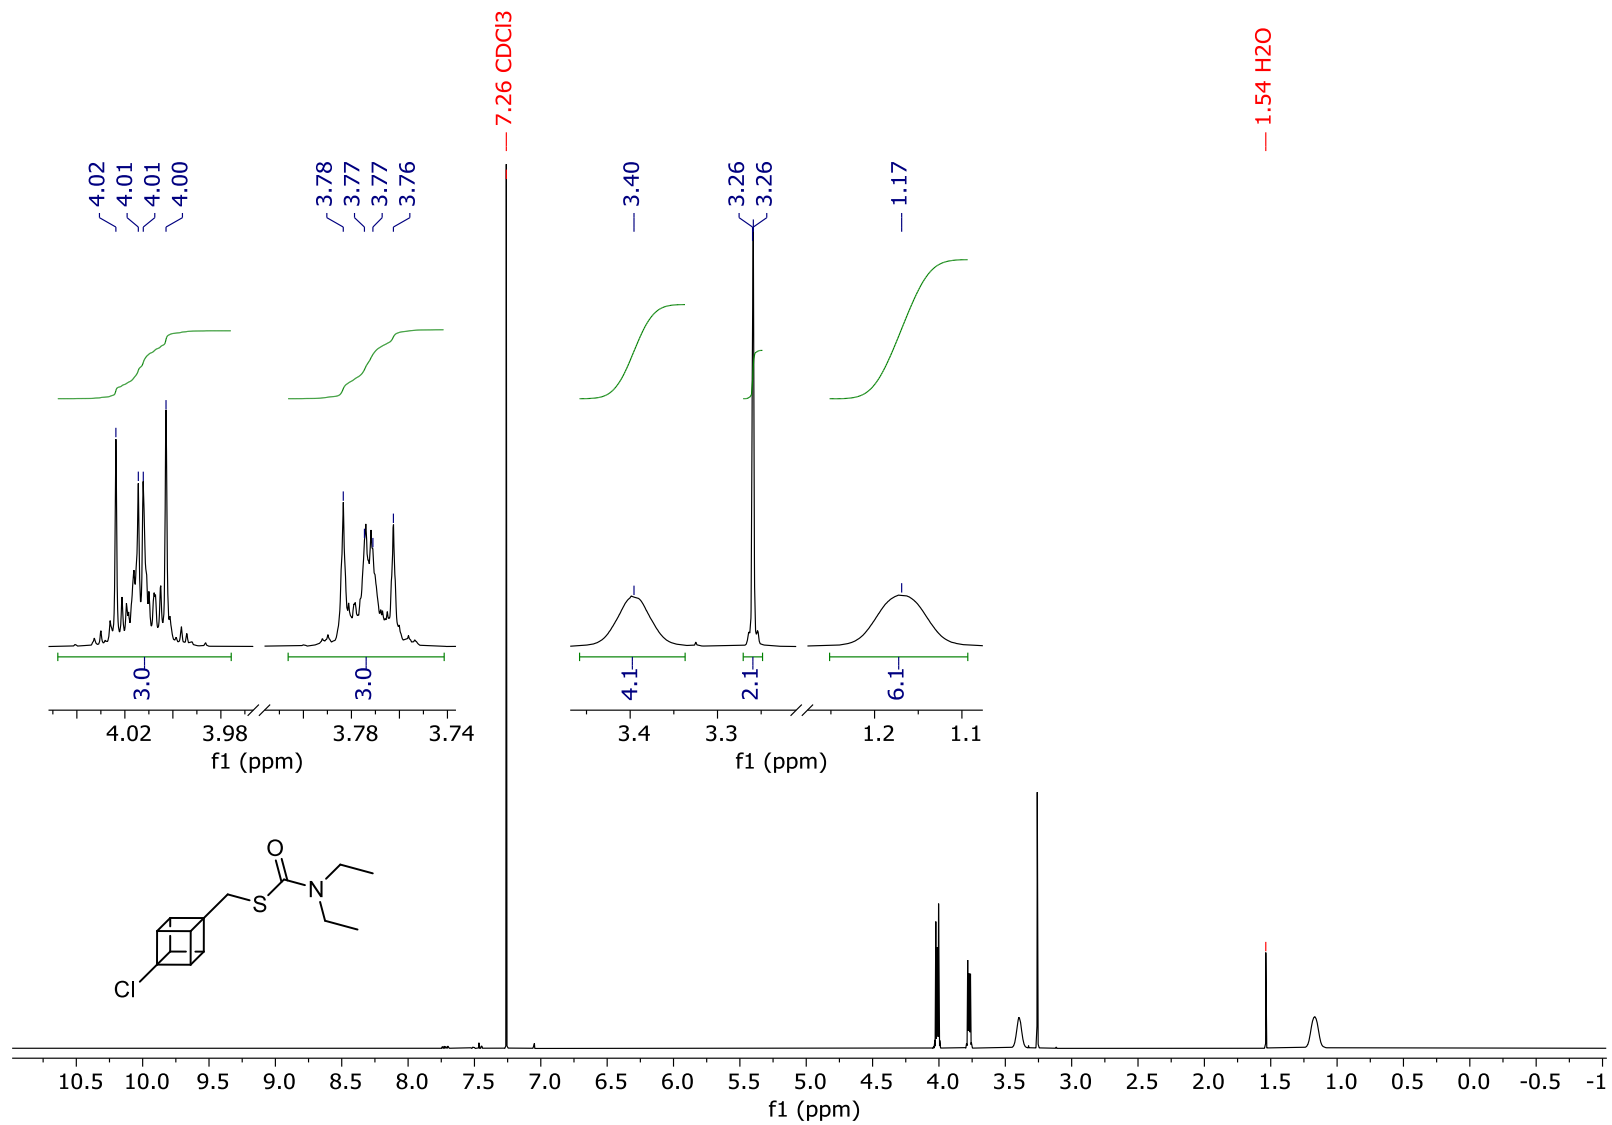

$^{13}\text{C}$  NMR (125 MHz,  $\text{CDCl}_3$ ) of ((4-Chlorocuban-1-yl)methyl)diethylcarbamothioate (38)

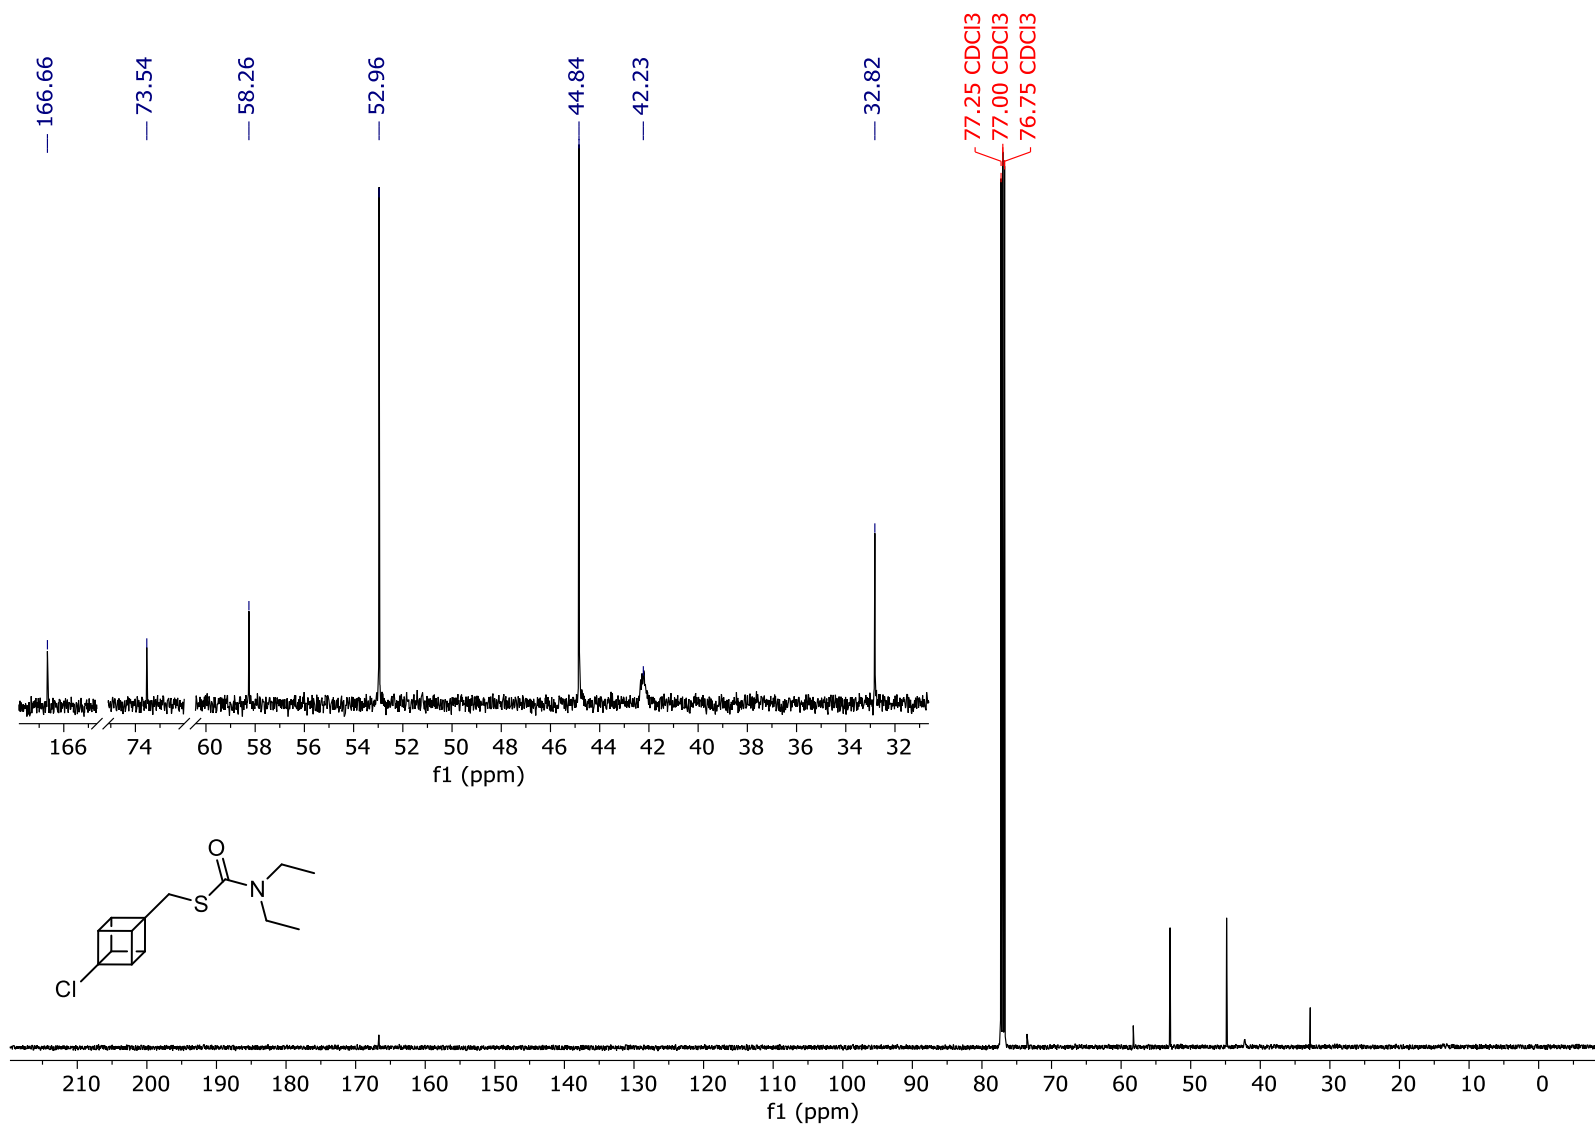

$^1\text{H}$  NMR (500 MHz,  $\text{CDCl}_3$ ) of COT-BT (28)

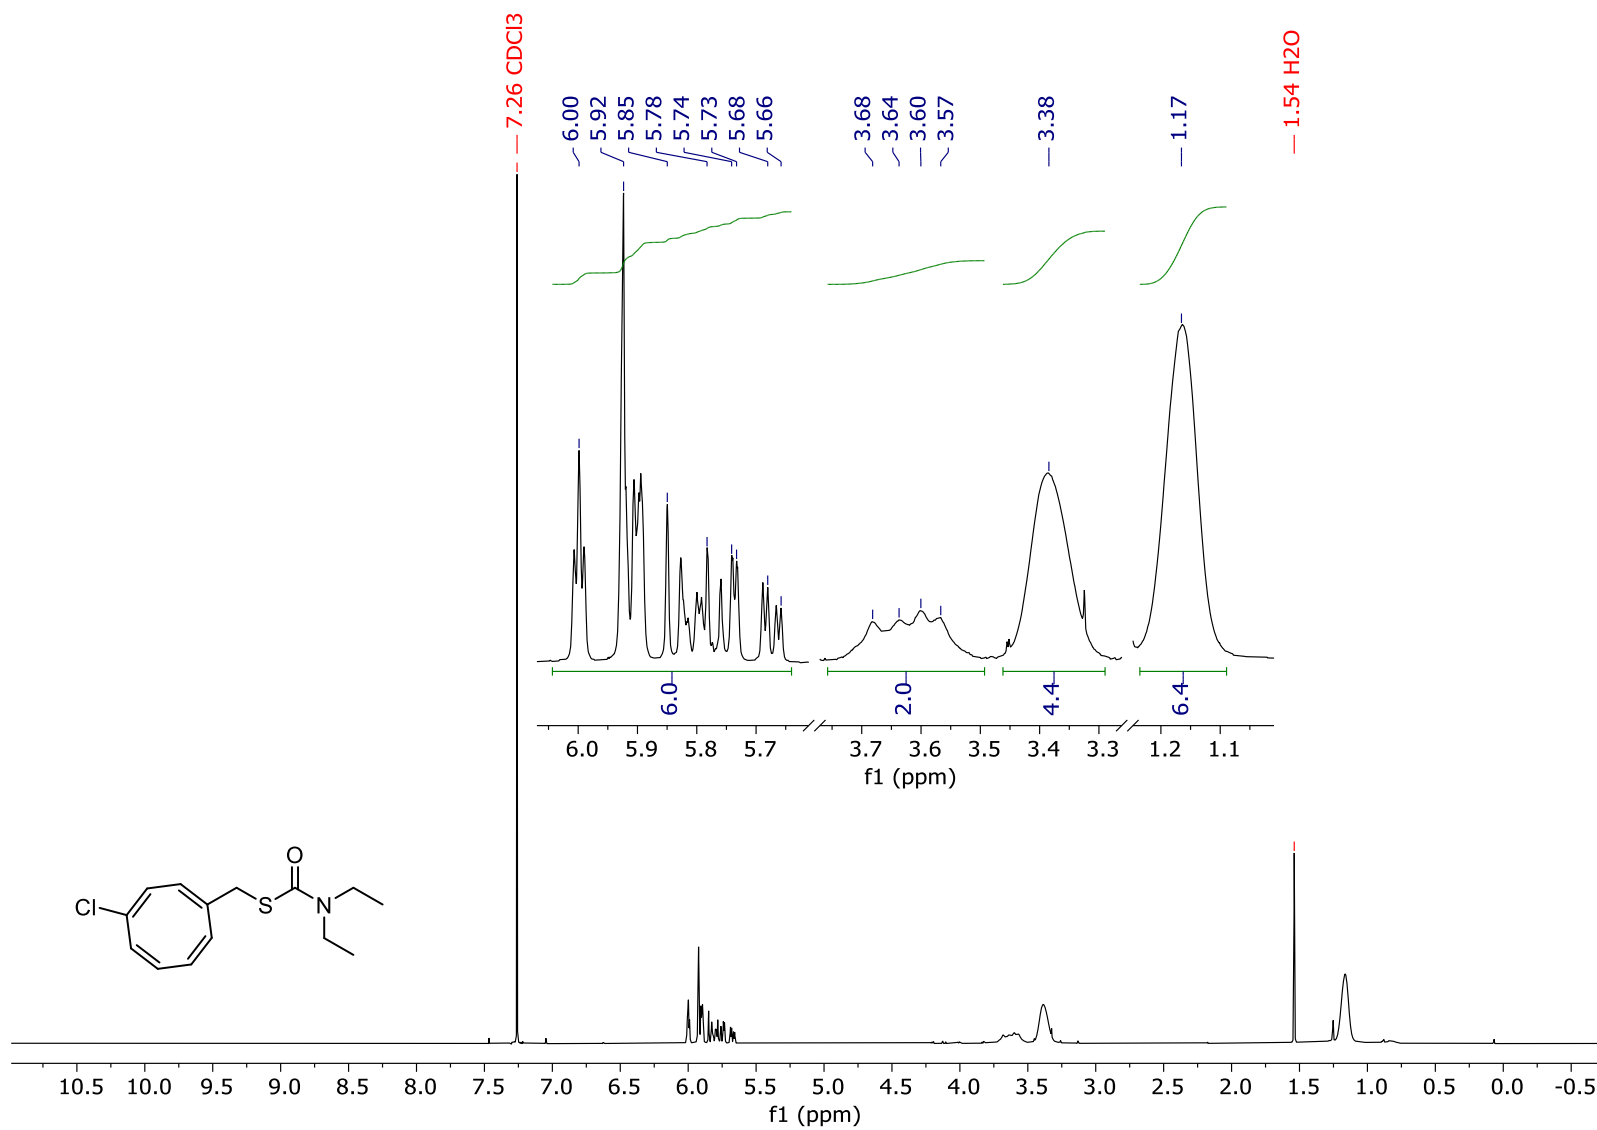

$^{13}\text{C}$  NMR (125 MHz,  $\text{CDCl}_3$ ) of COT-BT (28)

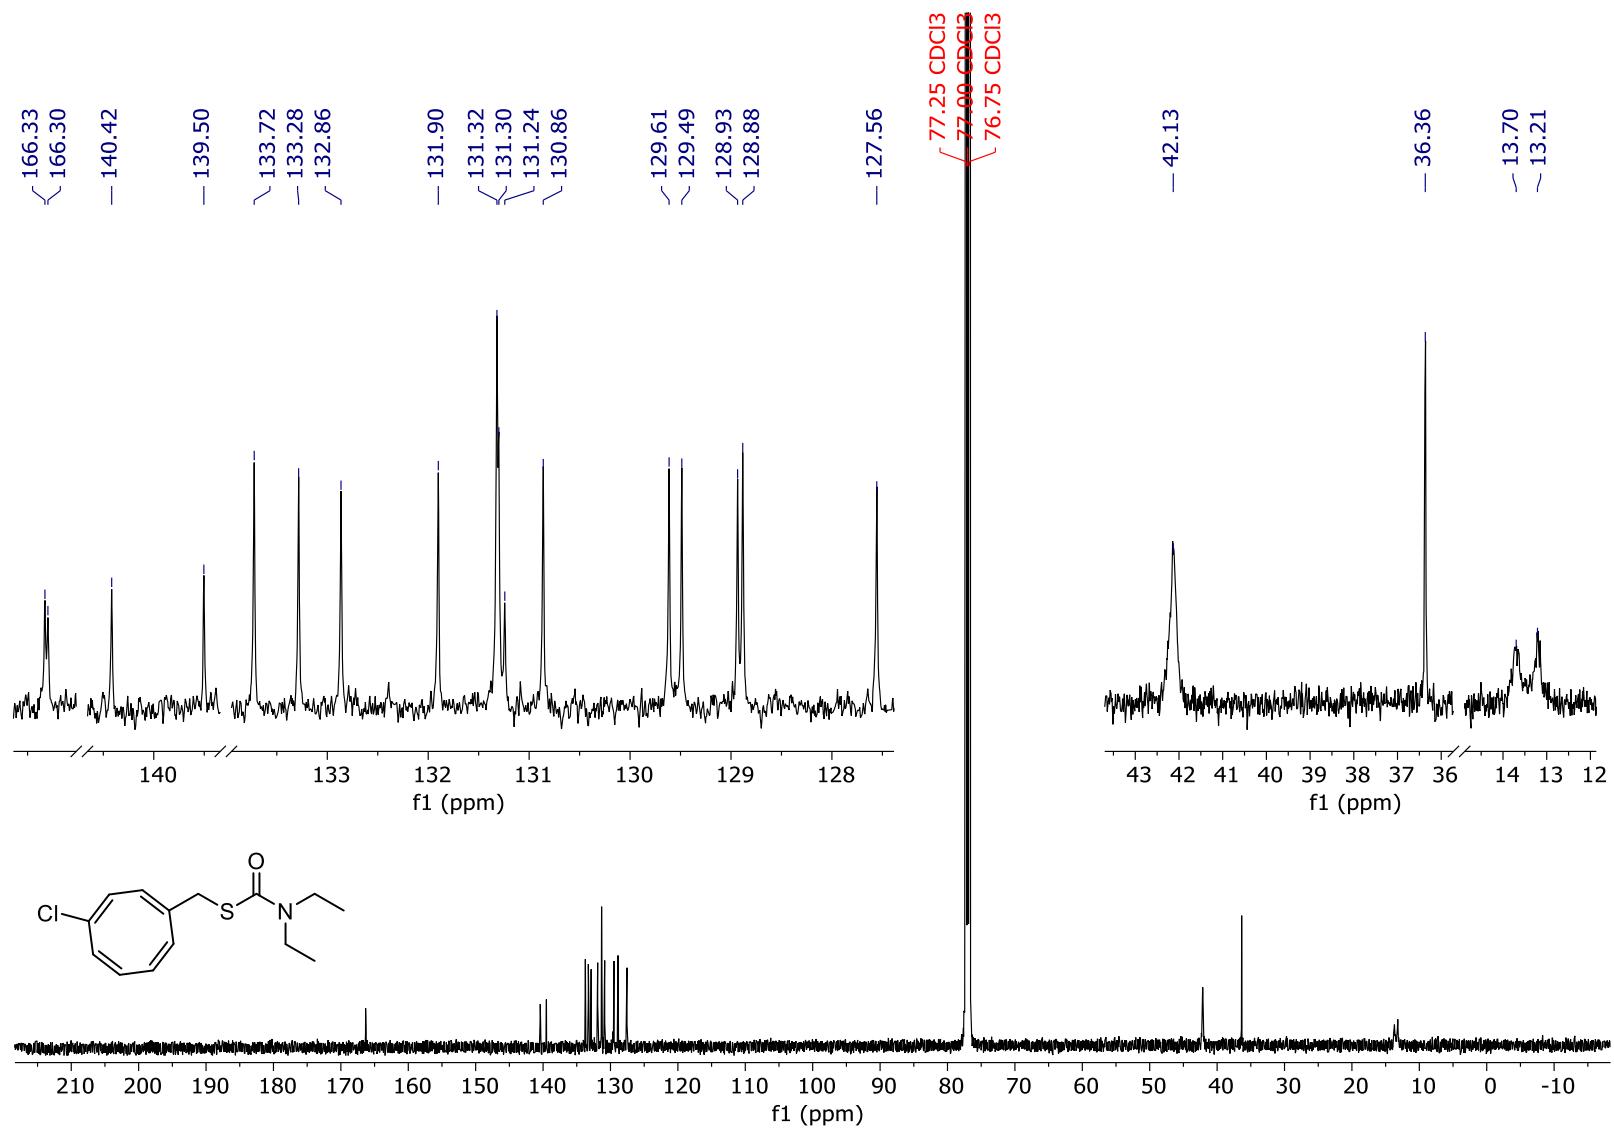



$^1\text{H}$ - $^{13}\text{C}$  HSQC NMR (500 MHz,  $\text{CDCl}_3$ ) of COT-BT (28)

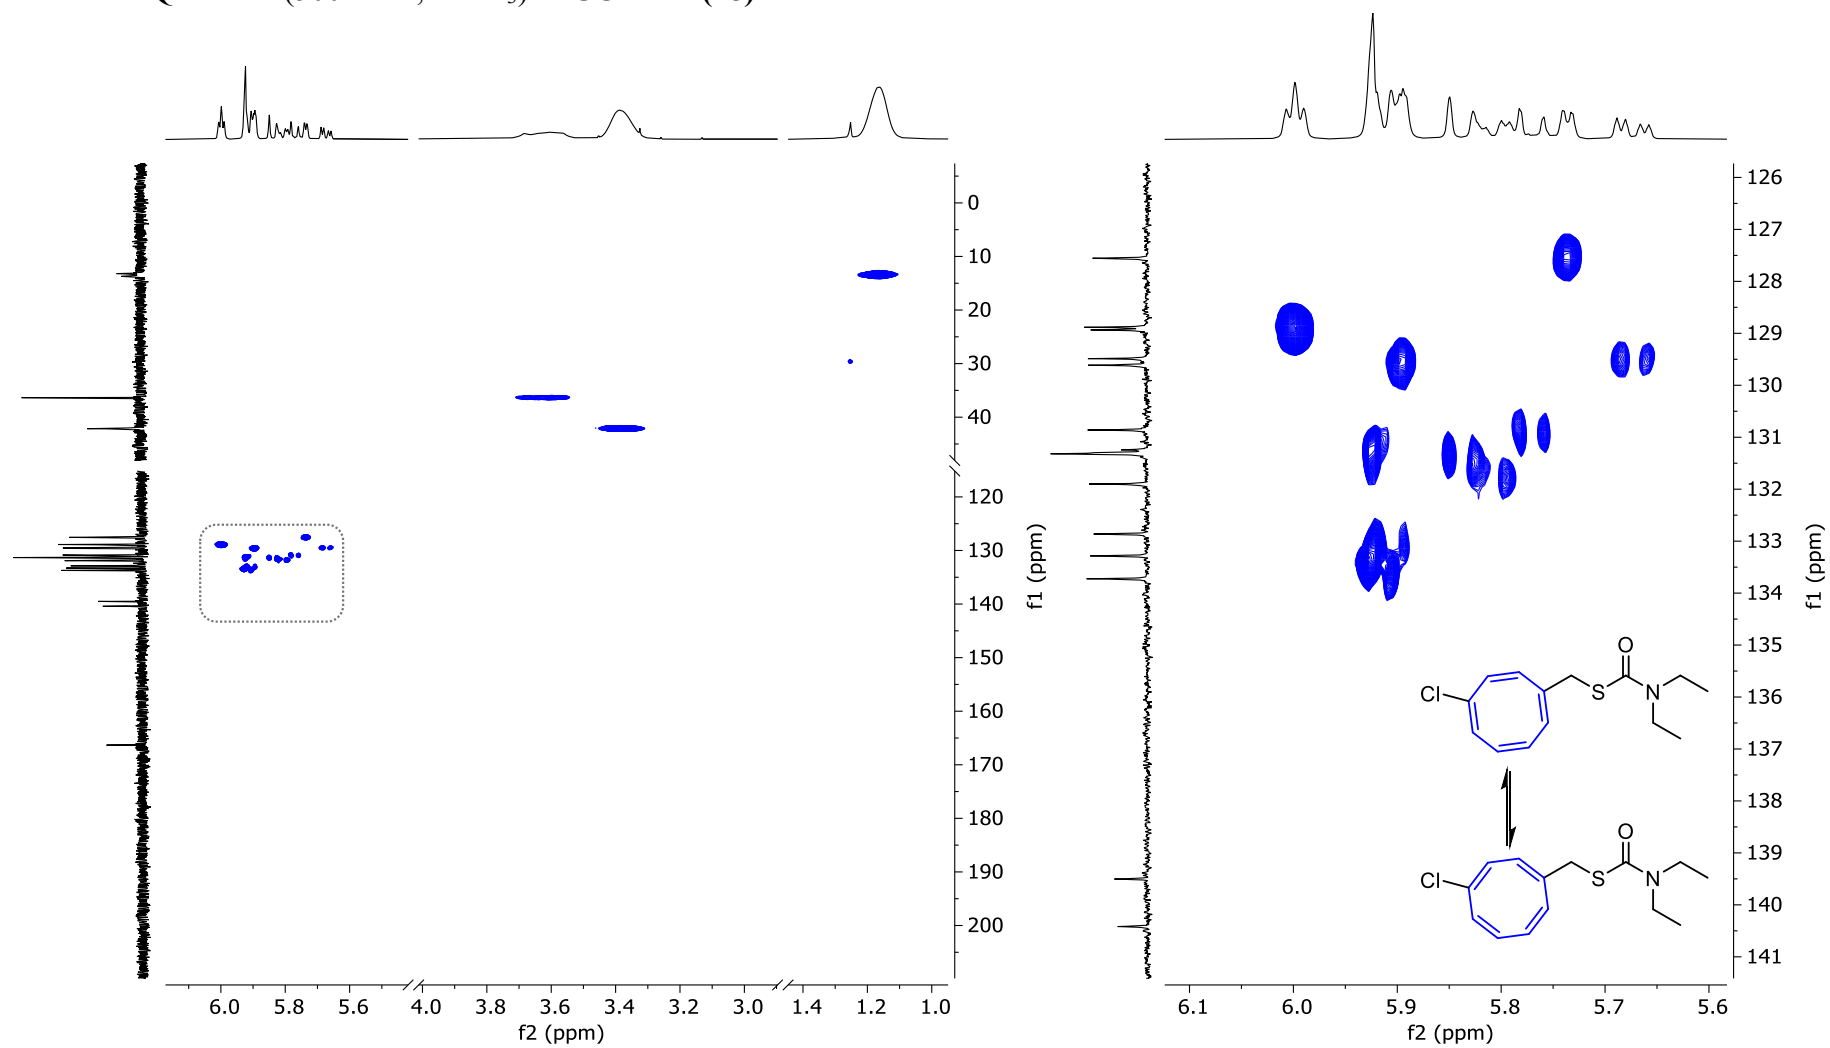

Supplement: d4sc06923d2.pdf [file d4sc06923d2.pdf]
